# Supplementary material for: Facile and robust methods for the regioselective acylation of N-acetylneuraminic acid
Source: Royal Society of Chemistry journal article supplement (doi:10.1039/c8nj02795a), 2018-01-01

## Supporting Information

### **Facile and robust methods for the regioselective acylation of N-acetylneuraminic acid**

Melanie Shadrick, Charlene Yu, Scott Geringer, Sean Ritter, Alexandra Behm , Abby Cox,  
Matt Lohman, and Cristina De Meo \*

*Department of Chemistry  
Southern Illinois University Edwardsville  
Science Building West, Box-1652,, Edwardsville, IL 62025, USA  
Email: [cdemeo@siue.edu](mailto:cdemeo@siue.edu)*

#### **Contents:**

|                                                               |     |
|---------------------------------------------------------------|-----|
| General Experimental                                          | S2  |
| Synthesis of thiosialosides from Polyol 1                     | S2  |
| Synthesis of C9-Picoloyl <b>4</b>                             | S2  |
| Synthesis of C-4,9 di-Picoloyl <b>6</b>                       | S4  |
| Synthesis of thiosialosides 7-14 by ReSET modified technology | S6  |
| Synthesis of C-7,8 di-Picoloyl <b>11</b>                      | S7  |
| Synthesis of C-7 Picoloyl <b>13</b>                           | S9  |
| Synthesis of C-4 Picoloyl <b>14</b>                           | S11 |
| NMR Spectra                                                   | S13 |

## General Experimental

The reactions were performed using commercial reagents (Aldrich, Acros, Carbosynth) and solvents purified according to standard procedures. Column chromatography was performed on silica gel 60 (Silicycle, 70-230 mesh) or Sephadex LH-20 (GE Healthcare); reactions were monitored by TLC on TLC Silica Gel 60 F254S (Millipore). The compounds were detected by examination under UV light and by charring with 10% sulfuric acid in methanol. Solvents were removed under reduced pressure at <40 °C. CH<sub>2</sub>Cl<sub>2</sub> and CH<sub>3</sub>CN were purified by MBraun solvent purification system (MB-SPS-800). Molecular sieves (3Å), used for reactions, were crushed and activated *in vacuo* at 390 °C during 8 h in the first instance and then for 2-3 h at 390 °C directly prior to application. Optical rotations were measured at 'Jasco P-1020' polarimeter. <sup>1</sup>H NMR spectra were recorded using a Bruker Ascend 400 MHz NMR Spectrometer and <sup>13</sup>C NMR spectra were recorded at 75 MHz. The <sup>1</sup>H NMR chemical shifts are referenced to the signal of the residual CHCl<sub>3</sub> (δ<sub>H</sub> = 7.27 ppm) for solutions in CDCl<sub>3</sub> and CD<sub>3</sub>OD (δ<sub>H</sub> = 3.31 ppm (q) and 4.87 ppm (s)). The <sup>13</sup>C NMR chemical shifts are referenced to the central signal of CDCl<sub>3</sub> (δ<sub>C</sub> = 77.23 ppm) for solutions in CDCl<sub>3</sub>. HRMS determinations were made with the use of JEOL MStation (JMS-700) Mass Spectrometer.

## Synthesis of thiosialosides 3-6 from Polyol 1

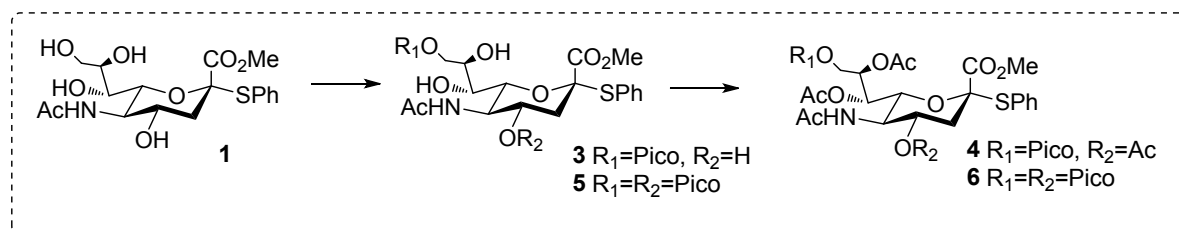

## Synthesis of 9-Picoloyl 4

*Methyl (2-thiophenyl 5-acetamido-3,5-dideoxy-4,7,8-tri-O-hydroxyl-9-O-picoloyl-D-glycero-β-D-galacto-2-nonulopyranosid)onate (3)*

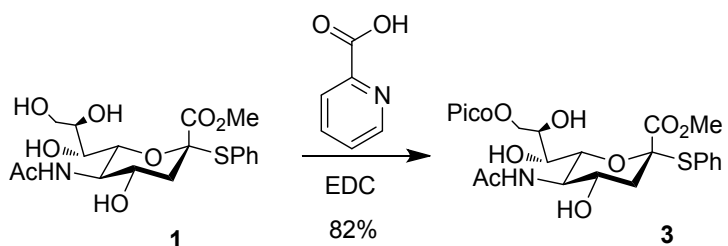

To a solution of **1** (100 mg, 0.24 mmol) in dry pyridine (4 mL), picolinic acid (177.3 mg, 1.44 mmol, 6.0 equiv) was added followed by EDC (149.0 mg, 0.96 mmol, 4.0 equiv). The reaction was allowed to stir for 1 h under argon at rt. The reaction was then co-evaporated with toluene (5 mL). The residue was purified by column

chromatography on silica gel (ethanol/dichloromethane, 5% gradient) to afford **3** (103 mg, 0.198 mmol, 82%).

**Analytical Data:**  $R_f = 0.49$  (ethanol/dichloromethane, 1/5 v/v);  $[\alpha]_D^{23} = +16.86$  ( $c = 1$ , MeOH)  $^1\text{H NMR}$  ( $\text{CD}_3\text{OD}$ )  $\delta$  8.72 (dq,  $J = 4.8$  Hz, 1H, aromatic), 8.22 (bd,  $J = 7.8$  Hz, 1H, aromatic), 8.06 (td,  $J = 7.8$ ,  $J = 1.6$  Hz, 1H, aromatic), 7.68 (ddd,  $J = 4.8$ ,  $J = 1.2$  Hz, 1H, aromatic), 7.59-7.55 (m, 2H, aromatic), 7.34-7.30 (m, 3H, aromatic), 4.70 (dd,  $J_{8,9a} = 2.4$  Hz,  $J_{9a,9b} = 11.4$  Hz, 1H, H-9a), 4.39 (dd,  $J_{8,9b} = 6.9$  Hz, 1H, H-9b), 4.13 (m,  $J_{7,8} = 9.1$  Hz, 1H, H-8), 3.84 (bq,  $J_{4,5} = 10.2$  Hz, 1H, H-5), 3.65 (m,  $J_{3eq,4} = 4.7$  Hz,  $J_{3ax,4} = 11.4$  Hz, 1H, H-4), 3.60 (s, 3H,  $\text{COOCH}_3$ ), 3.55 (dd,  $J_{7,6} = 1.6$  Hz, 1H, H-7), 3.47 (dd,  $J_{5,6} = 10.6$  Hz, 1H, H-6), 2.85 (dd,  $J_{3ax,3eq} = 12.7$ , 1H, H-3eq), 1.98 (s, 3H,  $\text{NHCOCH}_3$ ), 1.86 (dd, 1H, H-3ax).  $^{13}\text{C NMR}$   $\delta$  173.62, 169.5, 164.5, 149.1, 147.4, 137.9, 136.6, 129.6, 128.9, 128.4, 127.4, 125.2, 86.4, 75.5, 69.2, 68.8, 67.7, 67.5, 52.1, 51.7, 40.3, 31.3, 21.2, 13.0. HR-FAB MS  $[\text{M}+\text{Na}]^+$  calcd for  $\text{C}_{24}\text{H}_{28}\text{N}_2\text{O}_9\text{SNa}$  543.1413, found 543.1409.

**Methyl (2-thiophenyl 4,7,8-tri-acetyl-5-acetamido-3,5-dideoxy-9-O-picoloyl-D-glycero- $\beta$ -D-galacto-2-nonulopyranosid)onate (4)**

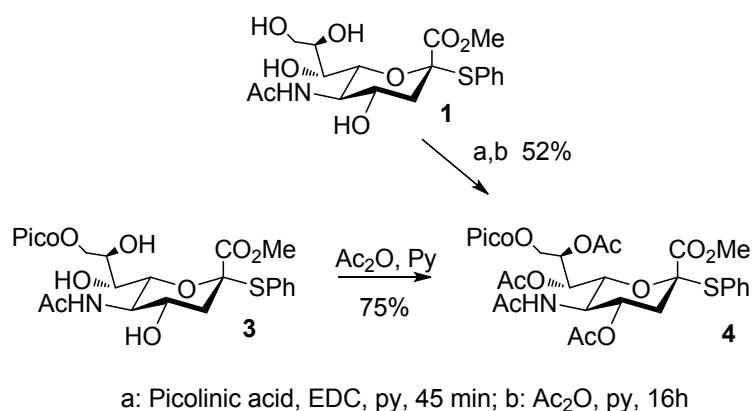

From **3**: To a solution of **3** (96 mg, 0.184 mmol) in dry pyridine (1.4 mL).  $\text{Ac}_2\text{O}$  (0.70 mL) was added dropwise. The reaction was allowed to stir for 16 h under argon at RT. The reaction was quenched with MeOH until no heat was detected, MeOH removed *in vacuo*. The crude mixture was diluted with  $\text{CH}_2\text{Cl}_2$  and washed with brine (10mL), sat. aq. sodium bicarbonate (10mL), and brine

(10mL). The organic phase was dried over  $\text{MgSO}_4$ , filtered, concentrated *in vacuo*. The compound was then purified by column chromatography on silica gel (acetone/toluene, 10%) to afford **4** (88mg, 0.136 mmol, 75%).

From **1**: To a solution of **1** (100 mg, 0.24 mmol) in dry pyridine (4 mL), picolinic acid (177.3 mg, 1.44 mmol, 6.0 equiv) was added followed by EDC (149.0 mg, 0.96 mmol, 4.0 equiv). The reaction was allowed to stir for 1 h under argon at rt. When starting material was fully consumed  $\text{Ac}_2\text{O}$  (0.91 mL, 9.6 mmol) was added dropwise and allowed to stir overnight. The reaction was quenched with MeOH until no heat was detected, MeOH removed *in vacuo*. The crude mixture was diluted with  $\text{CH}_2\text{Cl}_2$  and washed with brine (10mL), sat. aq. sodium bicarbonate (10mL), and brine (10mL). The organic phase was dried over  $\text{MgSO}_4$ , filtered, concentrated *in vacuo*. The compound was then purified by column chromatography on silica gel (acetone/dichloromethane, 10%) to afford **4** (81 mg, 0.13 mmol, 52%).

**Analytical Data**  $R_f = 0.62$  (acetone/dichloromethane), 3/5 v/v);  $[\alpha]_D^{23} = +22.67$  ( $c = 1$ ,  $\text{CHCl}_3$ );  $^1\text{H NMR}$  ( $\text{CHCl}_3$ )  $\delta$  8.84 (bd,  $J = 4.4$  Hz, 1H, aromatic), 8.17 (bd,  $J = 7.8$  Hz, 1H, aromatic), 7.92 (bt,  $J = 6.7$  Hz, 1H, aromatic), 7.58 – 7.51 (m, 3H, aromatic), 7.36 – 7.28 (m, 3H, aromatic), 5.82 (bs, 1H, NH), 5.49-5.41 (m, 2H, H-7, H-8), 4.88 (ddd, 1H,  $J_{3eq,4} = 4.8$  Hz,  $J_{4,5} = 10.1$  Hz, H-4), 4.81 (dd, 1H,  $J_{8,9a} = 2.8$  Hz,  $J_{9a,9b} =$

12.5 Hz H-9a), 4.46 (dd,  $J_{8,9b} = 5.0$  Hz, 1H, H-9b), 4.07-3.98 (m, 2H, H-5, H-6), 3.54 (s, 3H, COCH<sub>3</sub>), 2.79 (dd,  $J_{3eq,4} = 4.7$  Hz,  $J_{3ax,3eq} = 12.9$  Hz, 1H, H-3eq), 2.16, 2.04, 2.03, 2.00, 1.84 (4s, 13H, COOCH<sub>3</sub>, H-3ax). <sup>13</sup>C NMR δ 170.8, 170.3, 170.2, 170.1, 149.5, 137.7, 136.5, 129.8, 128.8, 128.5, 127.2, 125.5, 87.4, 77.2, 74.5, 69.8, 69.7, 68.3, 63.7, 52.6, 49.3, 38.0, 31.5, 30.9, 23.1, 22.6, 20.9, 20.8, 14.1. HR-FAB MS [M+Na]<sup>+</sup>calcd for C<sub>30</sub>H<sub>34</sub>N<sub>2</sub>O<sub>12</sub>SNa 669.1722, found 669.1714.

### Synthesis of C-4,9 di Picoloyl 6

#### Methyl (2-thiophenyl 5-acetamido-3,5-dideoxy-7,8-di-O-hydroxyl-4,9-O-di-picoloyl -D-glycero-β-D-galacto-2-nonulopyranosid)onate (5)

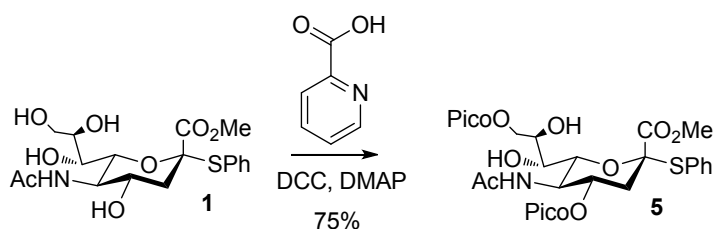

To a solution of **1** (100 mg, 0.24 mmol) was dissolved in dry pyridine (4 mL). Picolinic acid (177.3 mg, 1.44 mmol, 6 equiv) was added, followed by DCC (198.8 mg, 0.96 mmol, 4 equiv) and DMAP (14.8 mg, 0.12 mmol, 0.5 equiv). The reaction was allowed to stir

for 2.5 h under argon at rt. After 2.5 h, the reaction was co-evaporated with toluene (5 mL). The excess of reagent was crystallized with dichloromethane (5 mL) in the freezer for 1 h. The mixture was then filtered with cold dichloromethane and evaporated. The residue was purified by column chromatography on silica gel (acetone/dichloromethane, 10%, followed by methanol 100%) The residue was then further purified by column chromatography on silica gel (ethanol/dichloromethane, 5%) to afford **5** (113 mg, 0.18 mmol, 75%).

**Analytical Data** for **5** :  $R_f = 0.82$  (ethanol/dichloromethane, 1/5, v/v);  $[\alpha]^{23}_D = +22.56$  ( $c = \text{MeOH}$ ) <sup>1</sup>H NMR (CD<sub>3</sub>OD) δ 8.74-8.69 (m,  $J = \text{Hz}$ , 2H, aromatic), 8.24 (dt,  $J = 7.9$  Hz, 1H, aromatic), 8.15 (dt,  $J = 7.8$  Hz, 1H, aromatic), 8.07 (dt,  $J = 7.9$  Hz, 1H, aromatic), 8.02 (dd,  $J = 7.8$  Hz, 1H, aromatic), 7.71-7.64 (m, 2H, aromatic), 7.62-7.59 (m, 2H, aromatic) 7.37-7.31 9m, 3H, aromatic), 5.27 (ddd,  $J_{4,3eq} = 5.1$  Hz,  $J_{4,5} = 10.6$  Hz, 1H, H-4), 4.73 (dd,  $J_{9a,8} = 2.4$  Hz,  $J_{9a,9b} = 11.5$  Hz, 1H, H-9<sub>a</sub>), 4.40 (dd,  $J_{8,9b} = 6.8$  Hz,  $J_{9a,9b} = 11.4$  Hz, 1H, H-9<sub>b</sub>), 4.37 (bt, 1H, H-5), 4.16 (ddd,  $J_{8,9a} = 2.3$  Hz,  $J_{8,9b} = 6.5$  Hz,  $J_{8,7} = 8.9$  Hz, 1H, H-8), 3.83 (dd,  $J_{6,7} = 1.4$  Hz,  $J_{6,5} = 10.7$  Hz, 1H, H-6), 3.67 (s, 3H, COOCH<sub>3</sub>), 3.62 (dd,  $J_{7,6} = 1.42$  Hz,  $J_{7,8} = 9.2$  Hz, 1H, H-7), 3.08 (dd,  $J_{3ax,3eq} = 12.7$  Hz, 1H, H-3eq), 2.18 (br t, 1H, H-3ax), 1.83 (s, 3H, NHCOCH<sub>3</sub>). <sup>13</sup>C NMR δ 174.2, 170.5, 166.1, 165.3, 150.9, 150.7, 148.9, 148.3, 139.4, 139.4, 138.2, 131.3, 130.2, 130.0, 129.1, 129.0, 126.9, 126.8, 87.9, 76.6, 73.1, 70.5, 70.3, 69.1, 56.1, 53.4, 50.6, 38.6, 32.2, 29.6, 22.8. HR-FAB MS [M+Na]<sup>+</sup>calcd for C<sub>30</sub>H<sub>31</sub>N<sub>3</sub>O<sub>10</sub>SNa 648.1620, found 648.1684.

**Methyl (2-thiophenyl 7,8-di-O-acetyl-5-acetamido-3,5-dideoxy-9,4-di-O-picoloyl-d-glycero- $\beta$ -d-galacto-2-nonulopyranosid)onate (6)**

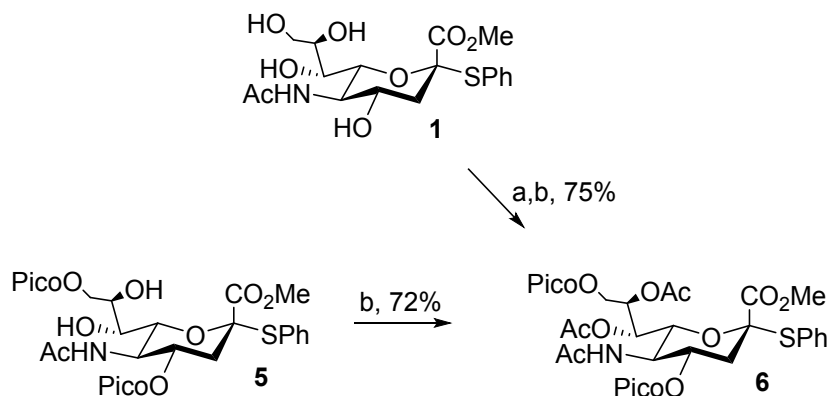

a: Picolinic acid, DDC, DMAP, py, 2.5 h; b: Ac<sub>2</sub>O, py, 16h

(acetone/dichloromethane, 10%) to afford **6** (90 mg, 0.13 mmol, 72%).

From **1**: To a solution of **1** (100 mg, 0.24 mmol) in dry pyridine (4 mL), picolinic acid (177.3 mg, 1.44 mmol, 6 equiv) was added, followed by DCC (198.8 mg, 0.96 mmol, 4 equiv) and DMAP (14.8 mg, 0.12 mmol, 0.5 equiv). The reaction was allowed to stir for 2.5 h under argon at rt. MeOH (0.4 mL) was added dropwise to quench any picolinic anhydride. Ac<sub>2</sub>O (1.5 mL, 15.87 mmol) was added dropwise and allowed to stir overnight. The reaction was quenched with MeOH until no heat was detected, MeOH removed *in vacuo*. The crude mixture was diluted with CH<sub>2</sub>Cl<sub>2</sub> and washed with brine (10mL), sat. aq. sodium bicarbonate (10mL), and brine (10mL). The organic phase was dried over MgSO<sub>4</sub>, filtered, concentrated *in vacuo*. The compound was then purified by column chromatography on silica gel (acetone/dichloromethane, 10%) to afford **6** (129 mg, 0.182 mmol, 75%).

**Analytical Data**  $R_f = 0.41$  (acetone/dichloromethane, 3/5 v/v);  $[\alpha]^{23}_D = +31.29$  ( $c = 1$ , CHCl<sub>3</sub>); <sup>1</sup>H NMR (CHCl<sub>3</sub>)  $\delta$  8.85 (bdq,  $J = 0.8$  Hz,  $J = 1.7$  Hz,  $J = 4.8$  Hz, 1H, aromatic), 8.80 (bdq,  $J = 0.8$  Hz,  $J = 1.7$  Hz,  $J = 4.8$  Hz, 1H, aromatic), 8.14 (dt,  $J = 7.8$  Hz, 1H, aromatic), 8.06 (dt,  $J = 7.8$  Hz, 1H, aromatic), 7.89-7.80 (m, 2H, aromatic), 7.57-7.46 (m, 4H, aromatic), 7.38-7.29 (m, 3H, aromatic), 7.20-7.14 (m, 2H, aromatic), 6.25 (dd,  $J_{NH,5} = 8.8$  Hz, 1H, NH), 5.53-5.44 (m, 2H, H-7, H-8), 5.34-5.24 (m, 1H, H-4), 4.84 (dd,  $J_{9a,8} = 2.4$  Hz,  $J_{9a,9b} = 12.1$  Hz, 1H, H-9<sub>a</sub>), 4.48 (dd,  $J_{8,9b} = 4.8$  Hz, 1H, H-9<sub>b</sub>), 4.26-4.16 (m, 2H, H-5, H-6), 3.54 (s, 3H, COOCH<sub>3</sub>), 2.99 (dd,  $J_{3eq,4} = 4.4$  Hz,  $J_{3ax,3eq} = 12.4$  Hz, 1H, H-3<sub>eq</sub>), 2.18, 2.19, 2.03, 1.74 (3s, 10H, COOCH<sub>3</sub>, NHCOCH<sub>3</sub> H-3<sub>ax</sub>). <sup>13</sup>C NMR  $\delta$  170.3, 170.3, 170.1, 167.9, 164.5, 150.2, 149.9, 147.1, 137.4, 137.3, 136.5, 129.8, 128.8, 128.5, 127.2, 125.6, 125.4, 87.4, 77.3, 74.3, 71.2, 69.7, 68.0, 63.6, 52.6, 49.4, 38.2, 23.1, 20.9. HR-FAB MS  $[M+Na]^+$  calcd for C<sub>34</sub>H<sub>35</sub>N<sub>3</sub>O<sub>12</sub>SNa 732.1831, found 732.1826.

From **5**: To a solution of **5** (111 mg, 0.177 mmol) in dry pyridine (1.34 mL). Ac<sub>2</sub>O (0.67 mL) was added dropwise. DMAP (4.33 mg, 0.35 mmol, 0.2 equiv) was added. The reaction was allowed to stir for 16 h under argon at RT. The reaction was quenched with MeOH until no heat was detected, the residue was concentrated *vacuo* while co-evaporating with toluene. The compound was then purified by column chromatography on silica gel

## Synthesis of thiosialosides 7-14 by ReSEt modified technology

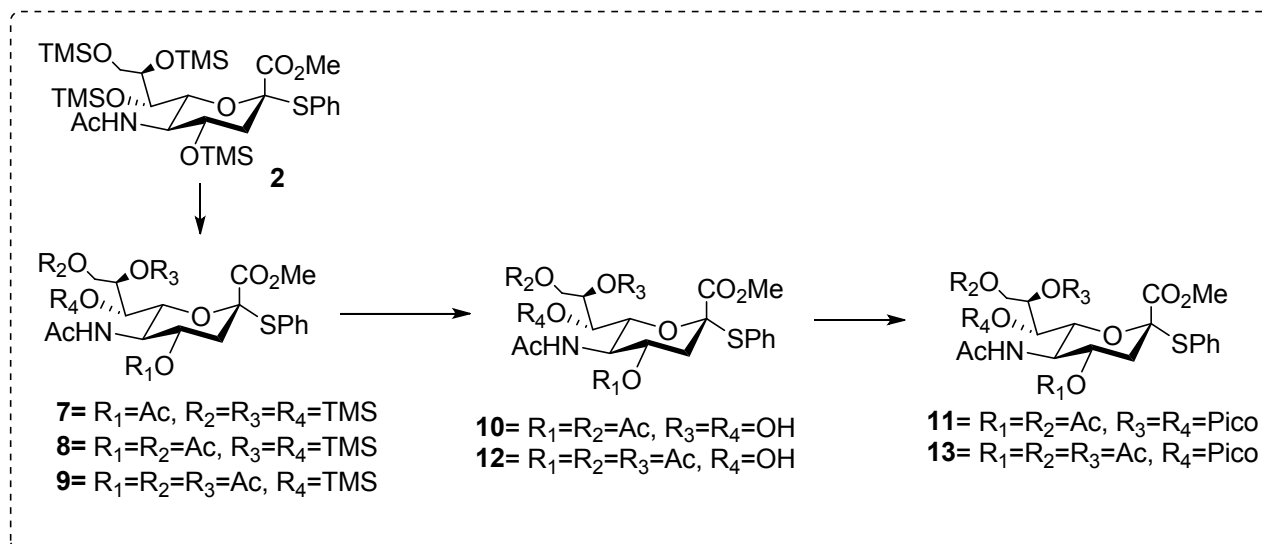

### Methyl (2-thiophenyl 5-acetamido-3,5-dideoxy-4,7,8,9-tetra-O-trimethylsilyl-D-glycero-β-D-galacto-2-nonulopyranosid)onate (2)

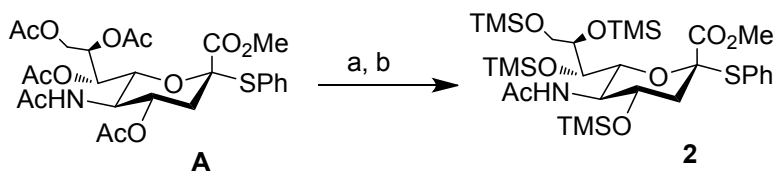

a: MeONa, MeOH; b:MSCl, HMDS, Pyridine, 69%

To a solution of methyl (phenyl 5-acetamido-4,7,8,9-tetra-O-acetyl-3,5-dideoxy-2-thio-D-glycero- $\alpha$ -D-galacto-non-2-ulopyranosid)onate (**A**,<sup>1</sup> 1.9 g, 3.2 mmol) in MeOH (167 mL), 1 M NaOMe (4.82 mL) was added dropwise. The resulting

mixture was stirred for 1 h under argon and then neutralized with Dowex H<sup>+</sup>. The resin was then filtered off, rinsed with MeOH, concentrated *in vacuo* and dried. Part of the residue (1.0 g, 2.4 mmol) was then dissolved in pyridine (10 mL), brought to 0 °C and hexamethyldisilazane (19.3 mmol, 4.2 mL, 8 equiv) was added drop wise followed by trimethylsilyl chloride (19.3 mmol, 2.4 mL, 8 equiv) and allowed to stir under argon for 16 h at rt. The reaction was then diluted with hexane, and washed with ice water (50 mL x 2), brine (50 mL x 2). The aqueous layer was washed with hexane (50 mL x2). The organic phase was dried over MgSO<sub>4</sub>, filtered, and concentrated *in vacuo*. The residue was purified by column chromatography on silica gel (ethyl acetate/hexane, 10% gradient) to afford **2** (1.2 g, 1.6 mmol, amorphous, white, 69%).

**Analytical Data** R<sub>f</sub> = 0.59 (ethyl acetate/hexane, 2/5 v/v); [ $\alpha$ ]<sub>D</sub><sup>23</sup> = +11.13 (*c* = 1, CHCl<sub>3</sub>); <sup>1</sup>H NMR (CHCl<sub>3</sub>)  $\delta$  7.6-7.5 (m, 2H, aromatic), 7.44 – 7.29 (m, 3H, aromatic), 5.30 (d, *J*<sub>5,NH</sub> = 8.1 Hz, 1H, NH), 4.06 (dd, *J*<sub>8,9a</sub> = 2.8 Hz, *J*<sub>9a,9b</sub> = 10.6 Hz, 1H, H-9a), 3.95 (dd, *J*<sub>5,6</sub> = 10.5 Hz, *J*<sub>6,7</sub> = 2.2 Hz, 1H, H-6), 3.93-3.87 (m, *J*<sub>3ax,4</sub> = 11.4 Hz, *J*<sub>H3eq,4</sub> = 4.5 Hz 1H, H-4), 3.88-3.83 (m, *J*<sub>7,8</sub> = 2.9 Hz, *J*<sub>8,9b</sub> = 6.4 Hz, 1H, H-8), 3.78 (dd, 1H, H-7), 3.6 (s, 3H, COOCH<sub>3</sub>), 3.5 (dd, 1H, H-9b), 3.41-3.32 (m, 1H, H-5), 2.63 (dd, *J*<sub>3ax,3eq</sub> = 12.9, 1H, H-3eq), 1.90 (s, 1H, NHC(=O)CH<sub>3</sub>), 1.74 (dd, 1H, H-3ax), 0.16, 0.15, 0.11, 0.08 (s x4, 36H, Si(CH<sub>3</sub>)<sub>3</sub>). <sup>13</sup>C NMR  $\delta$

169.8, 169.1, 136.4, 129.7, 129.4, 128.6, 87.5, 77.2, 75.7, 74.7, 68.8, 64.2, 54.5, 52.4, 41.9, 23.9, 0.5, 0.5, 0.08. HR-FAB MS  $[M+Na]^+$ calcd for  $C_{30}H_{57}NO_8SSi_4Na$  726.2779, found 726.2759.

- (1) Kirchner, E.; Thiem, F.; Dernick, R.; Heukeshoven, J.; Thiem, J. *J. Carbohydr. Chem.* **1988**, *7*, 453.

**Methyl (2-thiophenyl 4-O-aceyl-5-acetamido-3,5-dideoxy-7,8,9-tri-O-trimethylsilyl -d-glycero- $\beta$ -d-galacto-2-nonulopyranosid)onate (7)**

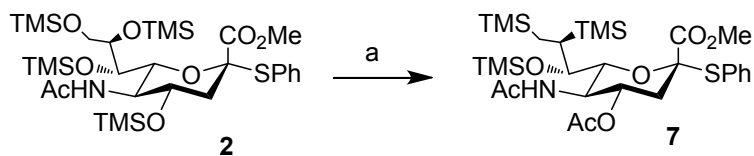

a:  $Ac_2O$ . DMAP, py, 48%

A solution of **2** (200 mg, 0.28 mmol) in dry pyridine (3 mL).  $Ac_2O$  (2.8 mmol, 0.27 mL, 10 equiv) was added dropwise followed by DMAP (3.40 mg, 0.03 mmol, 0.1 equiv). The reaction was allowed to stir for 15 hours under argon.

The reaction was quenched with MeOH until no heat was detected, and the solvent evaporated *in vacuo*. The crude mixture was diluted with  $CH_2Cl_2$  and washed with brine (15mL), sat. aq. sodium bicarbonate (15mL), and brine (15mL). The organic phase was dried over  $MgSO_4$ , filtered, and concentrated *in vacuo*. The residue was purified by column chromatography on silica gel (acetone/hexane, 10%) to afford **7** (90 mg, 0.133 mmol, 48%).

**Analytical Data**  $R_f = 0.59$  (acetone/hexane, 2/5 v/v);  $[\alpha]^{23}_D = +5.12$  ( $c = 1.1$ ,  $CHCl_3$ )  $^1H$  NMR ( $CHCl_3$ )  $\delta$  7.62 – 7.56 (m, 2H, aromatic), 7.41 – 7.29 (m, 3H, aromatic), 5.13 (d,  $J_{5,NH} = 10.0$  Hz, 1H, NH), 4.84 (ddd,  $J_{5,6} = 4.5$  Hz, 1H, H-4), 4.02 – 3.95 (m, 2H, H5, H-9a), 3.87 – 3.82 (ddd,  $J_{8,9a} = 2.6$  Hz,  $J_{7,8} = 5.5$  Hz,  $J_{8,9b} = 7.3$  Hz, 1H, H-4), 3.72 (dd,  $J_{6,7} = 1.7$  Hz, 1H, H-8), 3.69 – 3.65 (dd, s, 4H, H-6,  $COOCH_3$ ), 3.51 (dd,  $J_{9a,9b} = 10.5$  Hz, 1H, H-9b), 2.65 (dd,  $J_{4,3eq.} = 4.63$  Hz,  $J_{3eq.,3ax.} = 12.7$  Hz, 1H, H-3eq.), 2.01, 1.89 (s, 6H,  $NHCOCH_3$ ,  $COCH_3$ ), 1.90 (t, 1H, H-3ax), 0.17, 0.15, 0.10 (3s, 27H,  $Si(CH_3)_3$ ).  $^{13}C$  NMR  $\delta$  171.0, 169.8, 169.5, 168.6, 145.0, 136.6, 129.6, 129.1, 128.8, 128.7, 107.6, 86.7, 77.2, 76.1, 74.7, 73.4, 72.8, 71.4, 70.9, 68.8, 64.2, 63.2, 52.7, 52.3, 50.0, 47.4, 37.5, 23.4, 21.1, 20.9, 0.5. HR-FAB MS  $[M+Na]^+$ calcd for  $C_{29}H_{51}NO_9SSi_3Na$  696.2482, found 696.2502

**Synthesis of C-7,8 di Picoloyl 11**

**Methyl (2-thiophenyl 4,9-di-O-aceyl-5-acetamido-3,5-dideoxy-7,8-tri-O-trimethylsilyl-d-glycero- $\beta$ -d-galacto-2-nonulopyranosid)onate (8)**

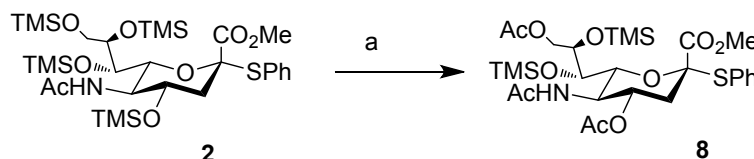

a:  $Ac_2O$ . DMAP, py, 57%

To a solution of **2** (100 mg, 0.142 mmol) in dry pyridine (1.5 mL),  $Ac_2O$  (0.71, mmol, 0.07 mL, 5 equiv) was added followed by DMAP (3.47 mg, 0.028 mmol, 0.2 equiv). The reaction was allowed to stir for 20 h under argon at RT. The reaction was quenched with MeOH until no heat was detected, MeOH removed *in vacuo*. The crude mixture was diluted with  $CH_2Cl_2$

and washed with brine (15mL), sat. aq. sodium bicarbonate (15mL), and brine (15mL). The organic phase

was dried over  $\text{MgSO}_4$ , filtered, and concentrated *in vacuo*. The residue was purified by column chromatography on silica gel (acetone/hexane, 10%) to afford **8** (52 mg, 0.08 mmol, 57%).

**Analytical Data**  $R_f = 0.54$  (acetone/hexane, 2/5 v/v);  $[\alpha]_D^{23} = +8.73$  ( $c = 1$ ,  $\text{CHCl}_3$ );  $^1\text{H NMR}$  ( $\text{CHCl}_3$ )  $\delta$  7.61-7.53 (m, 2H, aromatic), 7.42-7.13 (m, 3H, aromatic), 5.06 (d,  $J_{\text{NH},5} = 9.9$  Hz, 1H, NH), 4.85 (ddd,  $J_{4,3\text{eq}} = 4.6$  Hz,  $J_{4,5} = 10.1$  Hz, 1H, H-4), 4.46 (dd,  $J_{9a,8} = 2.6$  Hz,  $J_{9a,9b} = 12.1$  Hz, 1H, H-9a), 4.09 (dd,  $J_{9b,8} = 6.1$  Hz, 1H, H-9b), 3.99 (bq,  $J_{5,6} = 10.6$  Hz, 1H, H-5), 3.95 (td,  $J_{8,7} = 5.1$  Hz, 1H, H-8), 3.77 (dd,  $J_{7,6} = 1.2$  Hz, 1H, H-7), 3.68 (s, 3H,  $\text{COOCH}_3$ ), 3.60 (dd, 1H, H-6), 2.70 (dd,  $J_{3\text{eq},3\text{ax}} = 12.8$  Hz, 1H, H-3eq), 1.94 (bt, 1H, H-3ax), 2.09, 2.03, 1.89 (3s, 9H,  $\text{NHCOCH}_3$ ,  $\text{COCH}_3$ ), 0.17, 0.08 (2s, 18H,  $\text{Si}(\text{CH}_3)_3$ ).  $^{13}\text{C NMR}$   $\delta$  171.1, 170.8, 168.6, 136.9, 128.7, 86.7, 73.0, 72.1, 70.7, 66.4, 52.8, 50.2, 37.6, 23.5, 21.2, 20.9. HR-FAB MS  $[\text{M}+\text{Na}]^+$  calcd for  $\text{C}_{28}\text{H}_{45}\text{NO}_{10}\text{SSi}_2\text{Na}$  666.2200, found 666.2161

**Methyl (2-thiophenyl 4,9-di-O-acetyl 5-acetamido-3,5-dideoxy-7,8-di-O-hydroxyl-d-glycero- $\beta$ -d-galacto-2-nonulopyranosid)onate (10)**

From **8**: Dowex  $\text{H}^+$  (176.8 mg) was added to a solution of **8** (172 mg, 0.76 mmol) in MeOH (15.2 mL). The residue was allowed to stir for 2.5 h under argon. It was then filtered, concentrated *in vacuo*, and purified

by column chromatography on silica gel (acetone/hexane, 10%) to afford **10** (277 mg, 0.55 mmol, 73%)

a) Dowex,  $\text{H}^+$ , MeOH, 73%;  
b)  $\text{Ac}_2\text{O}$ , DMAP, py, 62%;

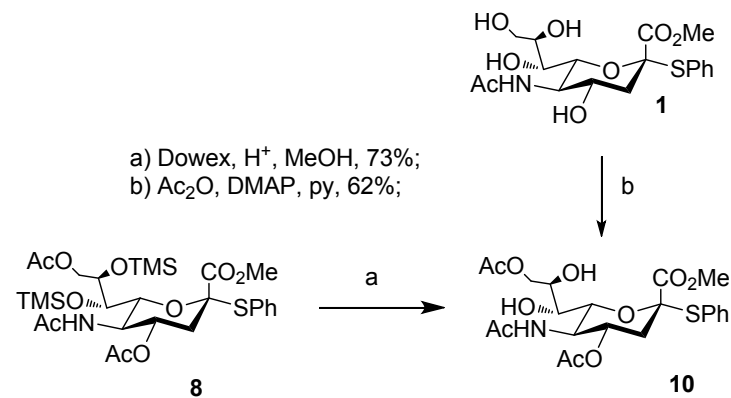

From **1**: to a solution of **1** (200 mg, 481 mmol) in dry pyridine (9.6 mL),  $\text{Ac}_2\text{O}$  (4.81 mmol, 0.46 mL, 10 equiv) was added dropwise. The reaction was allowed to stir for 3.5 h under argon at RT. The reaction was quenched with MeOH until no heat was detected, and the crude mixture was concentrated *in vacuo*. The compound was

then purified by column chromatography on silica gel (acetone/dichloromethane, 10%) to afford **10** (150 mg, 0.301 mmol, 62%).

**Analytical Data**  $R_f = 0.17$  (acetone/hexane, 2/5 v/v);  $[\alpha]_D^{23} = +23.75$  ( $c = 1$ ,  $\text{CHCl}_3$ );  $^1\text{H NMR}$  ( $\text{CHCl}_3$ )  $\delta$  7.56-7.51 (2H, aromatic), 7.47-7.30 (3H, aromatic), 5.99 (bs, 1H, NH), 4.90 (ddd,  $J_{4,3\text{eq}} = 4.9$  Hz,  $J_{4,5} = 10.7$  Hz, 1H, H-4), 4.77 (d,  $J_{7,\text{OH}} = 4.3$  Hz, 1H, OH-7), 4.42 (bd,  $J_{9a,9b} = 11.4$  Hz, 1H, H-9a), 4.14 (dd,  $J_{9b,8} = 6.7$  Hz, 1H, H-9b), 4.05-3.96 (m, 2H, H-5, H-8), 3.67 (s, 3H,  $\text{COOCH}_3$ ), 3.43 (bdd,  $J_{7,6} = 1.4$  Hz,  $J_{7,8} = 9.4$  Hz, 1H, H-7), 3.33 (dd,  $J_{5,6} = 10.5$  Hz, 1H, H-6), 3.27 (d,  $J_{8,\text{OH}} = 4.0$  Hz, 1H, OH-8), 2.85 (dd,  $J_{3\text{eq},3\text{ax}} = 13.0$  Hz, 1H, H-3eq), 2.15 (m, 1H, H-3ax), 2.11, 2.10, 1.96 (s, 9H,  $\text{NHCOCH}_3$ ,  $\text{COCH}_3$ ).  $^{13}\text{C NMR}$   $\delta$  172.8, 171.2, 169.2, 136.9, 130.5, 128.0, 85.9, 69.3, 69.3, 68.9, 66.1, 53.3, 51.3, 37.2, 30.9, 23.0, 21.0, 21.0. HR-FAB MS  $[\text{M}+\text{Na}]^+$  calcd for  $\text{C}_{22}\text{H}_{29}\text{NO}_{10}\text{SNa}$  522.1409, found 522.1411



**Methyl (2-thiophenyl 4,9-di-O-aceyl-5-acetamido-3,5-dideoxy-7,8-di-O-picoloyl-d-glycero-β-d-galacto-2-nonulopyranosid)onate (11)**

DCC (419.3 mg, 2.03 mmol, 8 equiv), DMAP (24.8 mg, 0.2 mmol, 0.8 equiv), and Picolinic acid (250.13 mg, 2.03 mmol, equiv) were added to a solution of **10** (127 mg, 0.254 mmol) in CH<sub>2</sub>Cl<sub>2</sub> (3.81 mL). The

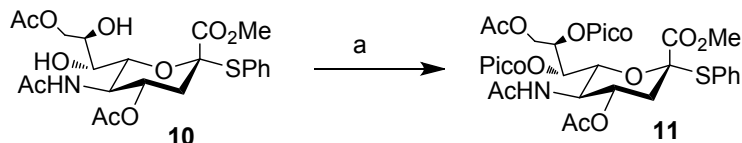

a) Picolinic acid, DCC, DMAP, 67%

mixture was stirred under argon for 3 h at rt. The resulting residue was then diluted with CH<sub>2</sub>Cl<sub>2</sub> and washed with brine (15 mL), sat. aq. Sodium bicarbonate (15 mL), and brine (15 mL). The organic phase was dried over MgSO<sub>4</sub>, filtered, and concentrated *in vacuo*. The residue

was then purified by column chromatography on silica gel (acetone/methylene chloride, 10% gradient) to afford **5b** (120 mg, 0.169 mmol, 67%).

**Analytical Data**  $R_f = 0.20$  (acetone/dichloromethane, 2/5 v/v);  $[\alpha]_D^{23} = +54.64$  ( $c = 1$ , CHCl<sub>3</sub>); <sup>1</sup>H NMR (CHCl<sub>3</sub>) δ 8.81 (dt,  $J = 4.5$  Hz, 1H, aromatic), 8.75 (dt,  $J = 4.4$  Hz, 1H, aromatic), 8.12 (bdd,  $J = 3.3$  Hz,  $J = 7.8$  Hz, 2H, aromatic), 7.92-7.82 (m, 2H, aromatic), 7.62-7.57 (m, 2H, aromatic), 7.54-7.47 (m, 2H, aromatic), 7.45-7.33 (m, 3H, aromatic), 5.90 (dd,  $J_{7,6} = 1.7$  Hz,  $J_{7,8} = 7.3$  Hz, 1H, H-7), 5.85-5.77 (m, 2H, NH, H-8), 4.95 (ddd,  $J_{4,3eq} = 4.7$  Hz,  $J_{4,5} = 10.8$  Hz, 1H, H-4), 4.66 (dd,  $J_{9a,9b} = 12.6$  Hz,  $J_{9a,8} = 2.8$  Hz, 1H, H-9a), 4.43 (dd,  $J_{9b,8} = 5.7$  Hz, 1H, H-9b), 4.17 (dd,  $J_{5,6} = 10.8$  Hz, 1H, H-6), 3.99 (bq, 1H, H-5), 2.83 (dd,  $J_{3eq,3ax} = 12.9$  Hz, 1H, H-3eq), 1.99, 1.98, 1.96, 1.88 (s, 10H, H-3ax, NHCOCH<sub>3</sub>, COCH<sub>3</sub>). <sup>13</sup>C NMR δ 170.7, 170.7, 170.3, 168.1, 163.8, 163.7, 150.2, 149.7, 147.7, 147.4, 137.2, 137.1, 129.9, 128.7, 125.7, 125.6, 87.7, 74.7, 71.2, 69.6, 69.3, 62.1, 52.5, 49.8, 38.0, 30.9, 29.3, 23.2, 20.8. HR-FAB MS  $[M+Na]^+$  calcd for C<sub>34</sub>H<sub>35</sub>N<sub>3</sub>O<sub>12</sub>SNa 732.1838, found 732.1836.

**Synthesis of C-7 Picoloyl 13**

**Methyl (2-thiophenyl 4,8,9-tri-O-aceyl-5-acetamido-3,5-dideoxy-7-O-trimethylsilyl -d-glycero-β-d-galacto-2-nonulopyranosid)onate (9)**

To a solution of **2** (100mg, 0.142 mmol) in dry pyridine (1.5 mL), Ac<sub>2</sub>O (2.84 mmol, 0.27 mL, 20 equiv)

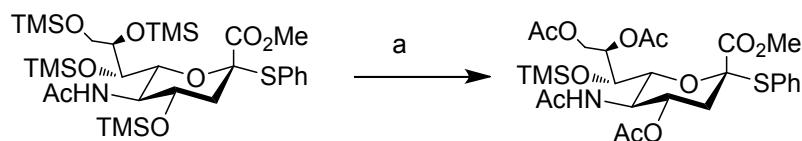

a) Ac<sub>2</sub>O, DMAP, py, 63%

was added followed by DMAP (3.42 mg, 0.028 mmol, 0.2 equiv). The reaction was brought to 40°C and allowed to stir for 20 h under argon. The reaction was then brought to RT and quenched with

MeOH until no heat was detected, MeOH removed *in vacuo*. The crude mixture was diluted with CH<sub>2</sub>Cl<sub>2</sub> and washed with brine (15mL), sat. aq. sodium bicarbonate (15mL), and brine (15mL). The organic phase was dried over MgSO<sub>4</sub>, filtered, concentrated *in vacuo*. The compound was then purified by column chromatography on silica gel (acetone/hexane, 10%) to afford **9** (55 mg, 0.089, 63%)

**Analytical Data:**  $R_f = 0.28$  (acetone/hexane, 2/3 v/v);  $[\alpha]_D^{23} = +10.26$  ( $c = 1$ , CHCl<sub>3</sub>); <sup>1</sup>H NMR (CHCl<sub>3</sub>) δ 7.59 – 7.51 (m, 2H, aromatic), 7.43 – 7.36 (m, 1H, aromatic), 7.36 – 7.30 (m, 2H, aromatic), 5.16 (d,  $J_{NH,5} = 10.0$  Hz, 1H, NH), 5.12 (ddd,  $J_{7,8} = 7.1$  Hz,  $J_{8,9a} = 4.4$  Hz,  $J_{8,9b} = 2.4$  Hz, 1H, H-8), 4.81 (ddd,  $J_{4,5} = 11.9$  Hz, 1H, H-4), 4.67 (dd, 1H, H-9b), 4.29 (dd,  $J_{9a,9b} = 12.4$  Hz, 1H, H-9a), 4.10 – 3.97 (m, 2H, H-5, H-7),

3.63 (s, 1H, OCH<sub>3</sub>), 3.57 (dd,  $J_{6,7} = 10.6$  Hz,  $J_{5,6} = 1.2$  Hz, 1H, H-6), 2.71 (dd,  $J = 12.8$  Hz,  $J_{3eq,4} = 4.7$  Hz, 1H, H-3eq), 2.08, 2.05, 2.03 (s x3, 9H, N(COCH<sub>3</sub>)<sub>2</sub>, OCOCH<sub>3</sub>), 1.96 (t,  $J_{3ax,4} = 10.2$  Hz 1H, H-3ax), 1.89 (s, 3H, OCOCH<sub>3</sub>), 0.18 (s, 9H, Si(CH<sub>3</sub>)<sub>3</sub>); <sup>13</sup>C NMR δ 171.1, 170.6, 170.3, 170.1, 168.6, 136.6, 129.8, 128.8, 128.8, 87.4, 77.2, 76.5, 73.9, 70.7, 70.1, 62.7, 52.9, 49.8, 37.6, 23.4, 21.2, 20.9, 20.9. HR-FAB MS [M+Na]<sup>+</sup>calcd for C<sub>27</sub>H<sub>39</sub>NO<sub>11</sub>SSiNa 636.1913, found 636.1890

**Methyl (2-thiophenyl 4,8,9-tri-O-acyl-5-acetamido-7-O-hydroxyl -3,5-dideoxy-D-glycero-β-D-galacto-2-nonulopyranosid)onate (12)**

Dowex H<sup>+</sup> (104.1mg) was added to a solution of **9** (289.1 mg, 0.47 mmol) in MeOH (9.42 mL). The residue

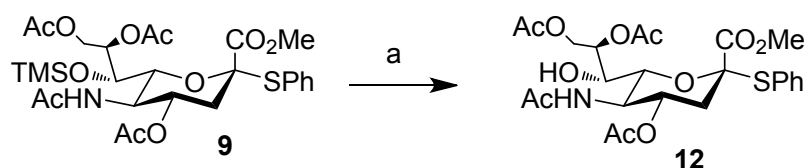

was allowed to stir for 1 h under argon. It was then filtered, concentrated *in vacuo*, yielding **12** (209.2 mg, 0.39, 82%).

a) Dowex, H<sup>+</sup>, MeOH, 82%;

**Analytical Data:**  $R_f = 0.49$  (acetone/hexane, 1/1 v/v);  $[\alpha]^{23}_D = -$

15.37; <sup>1</sup>H NMR (CHCl<sub>3</sub>) δ 7.53-7.48 (m, 2H, aromatic), 7.44 – 7.29 (m, 3H, aromatic), 5.97 (d,  $J_{5,NH} = 8.0$  Hz, 1H, NH), 5.19 (ddd,  $J_{7,8} = 9.1$ ,  $J_{8,9a} = 4.1$ ,  $J_{8,9b} = 2.4$  Hz, 1H, H-8), 4.90 (td,  $J_{3ax,4} = 11.7$  Hz, 1H, H-4), 4.65 (dd, 1H, H-9b), 4.55 (d,  $J_{OH,8} = 3.8$  Hz, 1H, OH-8), 4.34 (dd,  $J_{9a,9b} = 12.2$  Hz, 1H, H-9a), 3.99 (td,  $J_{5,6} = 10.5$  Hz, 1H, H-5), 3.69 (d,  $J_{6,7} = 8.9$  Hz, 1H, H-7), 3.53 – 3.41 (m, 4H, OCH<sub>3</sub>, H-6), 2.83 (dd,  $J_{3ax,3eq} = 12.8$  Hz,  $J_{3eq,4} = 4.7$  Hz, 1H, H-3eq), 2.10, 2.05, 1.99, 1.97 (s x4, 13H, NCOCH<sub>3</sub>, OCOCH<sub>3</sub>, H-3ax). <sup>13</sup>C NMR δ 172.6, 172.3, 170.8, 169.6, 167.8, 136.2, 129.7, 128.9, 128.7, 87.3, 75.7, 70.0, 69.2, 66.9, 62.9, 52.5, 51.7, 37.9, 29.3, 23.1, 21.0, 21.0, 20.9. HR-FAB MS [M+Na]<sup>+</sup>calcd for C<sub>24</sub>H<sub>31</sub>NO<sub>11</sub>SNa 564.1508, found 564.1514.

**Methyl (2-thiophenyl 4,8,9-tri-O-acyl-5-acetamido-3,5-dideoxy-7-O-picoloyl-D-glycero-β-D-galacto-2-nonulopyranosid)onate (13)**

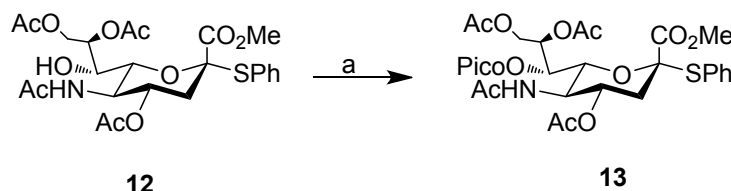

a) Picolinic acid, DCC, DMAP, 92%

DCC (159.2 mg, .77 mmol, 4 equiv), DMAP (9.4 mg, .077 mmol, 0.4 equiv), and Picolinic acid (95.03 mg, 0.77 mmol, 4 equiv) were added to a solution of **12** (209.2 mg, 0.39 mmol) in CH<sub>2</sub>Cl<sub>2</sub> (6.27 mL). The mixture was stirred under argon for 2 h at rt. The resulting residue was then diluted with CH<sub>2</sub>Cl<sub>2</sub> and washed with

brine (15 mL), sat. aq. Sodium bicarbonate (15 mL), and brine (15 mL). The organic phase was dried over MgSO<sub>4</sub>, filtered, and concentrated *in vacuo*. The residue was dissolved in CH<sub>2</sub>Cl<sub>2</sub>, placed in the freezer overnight, and filtered in the morning and then purified by column chromatography on silica gel (acetone/hexane, 10% gradient) to afford **13** (229.3 mg, 0.35 mmol, 92%). Analytical Data for **13**:  $R_f = 0.5$  (acetone/toluene, 3/2 v/v);  $[\alpha]^{21}_D = +29.68$  ( $c = 1$ , CHCl<sub>3</sub>) <sup>1</sup>H NMR (CHCl<sub>3</sub>) δ 8.83 (bd,  $J = 4.6$  Hz, 1H, aromatic), 8.10 (bd,  $J = 8.0$  Hz, 1H, aromatic), 7.90 (td,  $J = 7.7$  Hz,  $J = 1.6$  Hz, 1H, aromatic), 7.60 – 7.50 (m, 3H, aromatic), 7.45 – 7.31 (m, 3H, aromatic), 5.65 (dd,  $J_{7,8} = 6.9$  Hz, 1H, H-7), 5.48-5.39 (m, 2H, NH, H-8), 5.01 (ddd,  $J_{4,5} = 10.5$  Hz,  $J_{3ax,4} = 11.3$  Hz, 1H, H-4), 4.52 (dd,  $J_{8,9a} = 3.1$  Hz,  $J_{9a,9b} = 12.5$  Hz, 1H, H-9a), 4.26 (dd,  $J_{8,9b} = 5.4$  Hz, 1H, H-9b), 4.16 (dd,  $J_{5,6} = 10.9$  Hz,  $J_{6,7} = 1.8$  Hz, 1H, H-6), 3.86 (dd,  $J_{5,NH}$

= 9.8 Hz, 1H, H-5), 3.61 (s, 3H, OCH<sub>3</sub>), 2.85 (dd,  $J_{3ax,3eq} = 12.8$  Hz,  $J_{3eq,4} = 4.7$  Hz, 1H, H-3eq), 2.08, 2.03, 2.00, 1.97, 1.89 (s x4, 13H, NCOCH<sub>3</sub>, OCOCH<sub>3</sub>, H-3ax). <sup>13</sup>C NMR  $\delta$  170.8, 170.6, 170.2, 170.2, 167.9, 163.6, 150.0, 147.1, 137.4, 136.6, 129.9, 128.9, 128.6, 127.2, 125.6, 87.5, 74.4, 69.8, 69.3, 69.2, 62.1, 52.9, 50.1, 38.2, 21.0, 20.8, 20.8. HR-FAB MS [M+Na]<sup>+</sup>calcd for C<sub>30</sub>H<sub>34</sub>N<sub>2</sub>O<sub>12</sub>SNa 669.1722, found 669.1749.

### Synthesis of C-4 Picoloyl 14

#### Methyl (2-thiophenyl 4-O-picoloyl 7,8,9-tri-O-trimethylsilyl 5-acetamido-3,5-dideoxy-d-glycero- $\beta$ -d-galacto-2-nonulopyranosid)onate

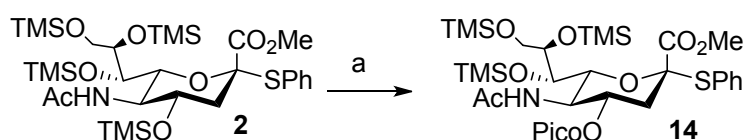

To a solution of **2** (200mg, 0.284 mmol) in dry pyridine (6mL), Picolinic Acid (87.9 mg, 0.71 mmol, 2.5 eq), EDC (110 mg, 0.71 mmol, 2.5 equiv) and DMAP (8.7 mg, 0.07 mmol) were added and

stirred at room temperature under argon. Every 1.5 hours an additional 2.5 equivalents of Picolinic acid and EDC were added to solution for a total of 4.5 hours. The resulting residue was then diluted with CH<sub>2</sub>Cl<sub>2</sub> and washed with brine (15 mL), sat. aq. sodium bicarbonate (15 mL), and brine (15 mL). The organic phase was dried over MgSO<sub>4</sub>, filtered, and concentrated *in vacuo*. The residue was then purified by column chromatography on silica gel (acetone/hexane, 10% gradient) to afford **14** (129 mg, 0.097 mmol, 62%).

**Analytical Data**  $R_f=0.69$  (acetone/hexane, 2/3 v/v);  $[\alpha]^{23}_D = +19.616$  ( $c = 1$ , CHCl<sub>3</sub>); <sup>1</sup>H NMR (CHCl<sub>3</sub>)  $\delta$  8.79-8.72 (m, 1H, aromatic), 8.07 (bd, 1H, aromatic), 7.85-7.80 (td, 1H aromatic), 7.63-7.59 (m, 2H, aromatic), 7.48-7.43 (m, 1H, aromatic) 7.41 – 7.29 (m, 3H, aromatic), 5.45-5.37 (bs, 1H, NH), 5.15 (ddd,  $J_{5,6} = 4.3$  Hz, 1H, H-4), 4.17 (dd,  $J_{5,6} = 10.0$  Hz, 1H, H5), 4.01(dd,  $J_{8,9a} = 2.6$  Hz,  $J_{9a,9b} = 10.6$  Hz 2H, H-9a), 3.92-3.84 (m, 2H, H-8, H-6), 3.78 (dd,  $J_{6,7} = 1.9$  Hz, 1H, H-7), 3.71 (s, 3H, COOCH<sub>3</sub>), 3.54 (dd, , 1H, H-9b), 2.89 (dd,  $J_{4,3eq} = 4.3$  Hz,  $J_{3eq,3ax} = 12.6$  Hz, 1H, H-3eq.), 1.79 (s, 3H, NHCOCH<sub>3</sub>), 2.05 (t, 1H, H-3ax), 0.18,0.16, 0.12 (3s, 27H, Si(CH<sub>3</sub>)<sub>3</sub>). <sup>13</sup>C NMR  $\delta$  170.0, 168.7, 168.5, 164.4, 149.9, 148.3, 147.3, 136.8, 136.6, 129.6, 129.1, 128.8, 128.7, 127.0, 125.7, 86.8, 75.3, 74.7, 73.5, 73.1, 72.6, 72.0, 64.2, 63.1, 52.8, 49.9, 37.8, 37.6, 23.5, 23.3, 19.1, 14.1, 1.3, 0.6. HR-FAB MS [M+Na]<sup>+</sup>calcd for C<sub>33</sub>H<sub>52</sub>N<sub>2</sub>O<sub>9</sub>SSi<sub>3</sub>Na 759.2591, found 759.2610.

#### Methyl (2-thiophenyl 4-O-picoloyl 7,8,9-tri-O-Acetyl 5-acetamido-3,5-dideoxy-d-glycero- $\beta$ -d-galacto-2-nonulopyranosid)onate (16)

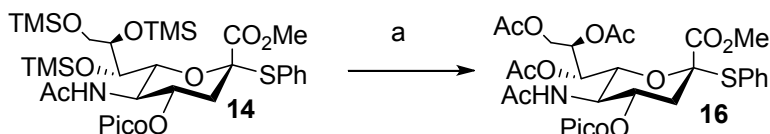

a) Ac<sub>2</sub>O, DMAP, Pyridine

To a solution of **14** (170 mg, 0.23 mmol) in dry pyridine (2.5 mL), Ac<sub>2</sub>O (1.3 mL) was added dropwise and DMAP (0.05 mmol, 5.6 mg, 0.2 equiv) was added. The reaction was allowed to stir for 16 h under argon at 40°C. The reaction was quenched

with MeOH until no heat was detected, and the crude mixture was concentrated *in vacuo*. The compound was then purified by column chromatography on silica gel (acetone/dichloromethane, 10%) to afford **16** (110 mg, 0.17 mmol, 74%). The compound isolated matched previously published data.



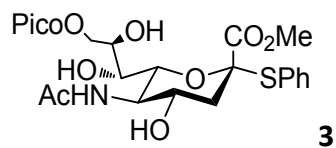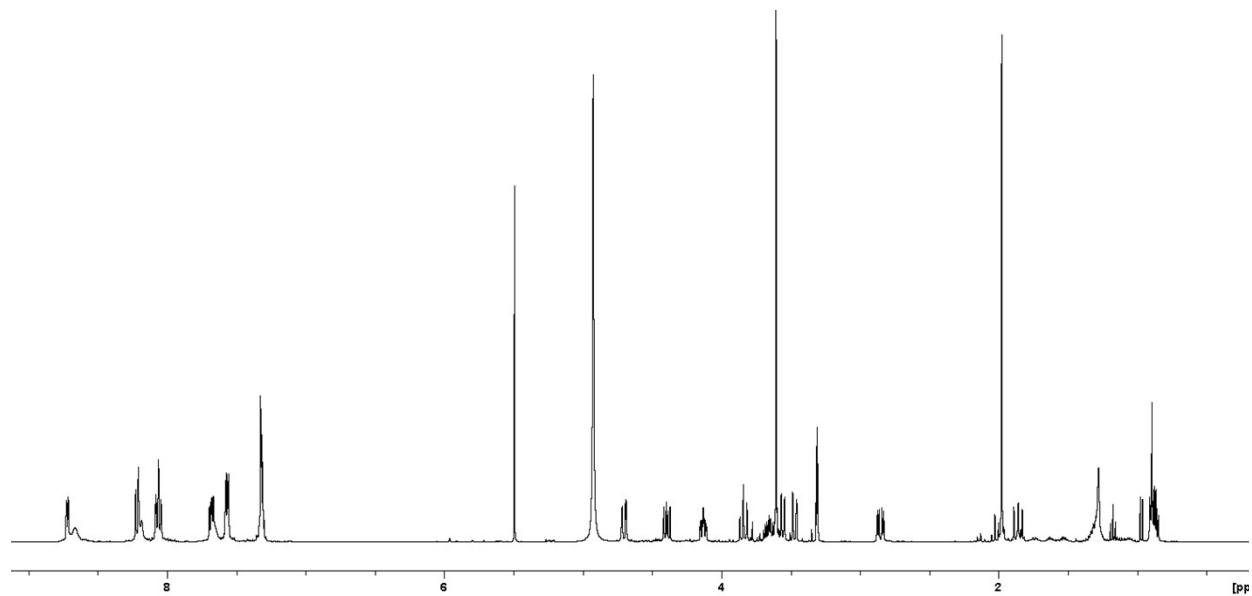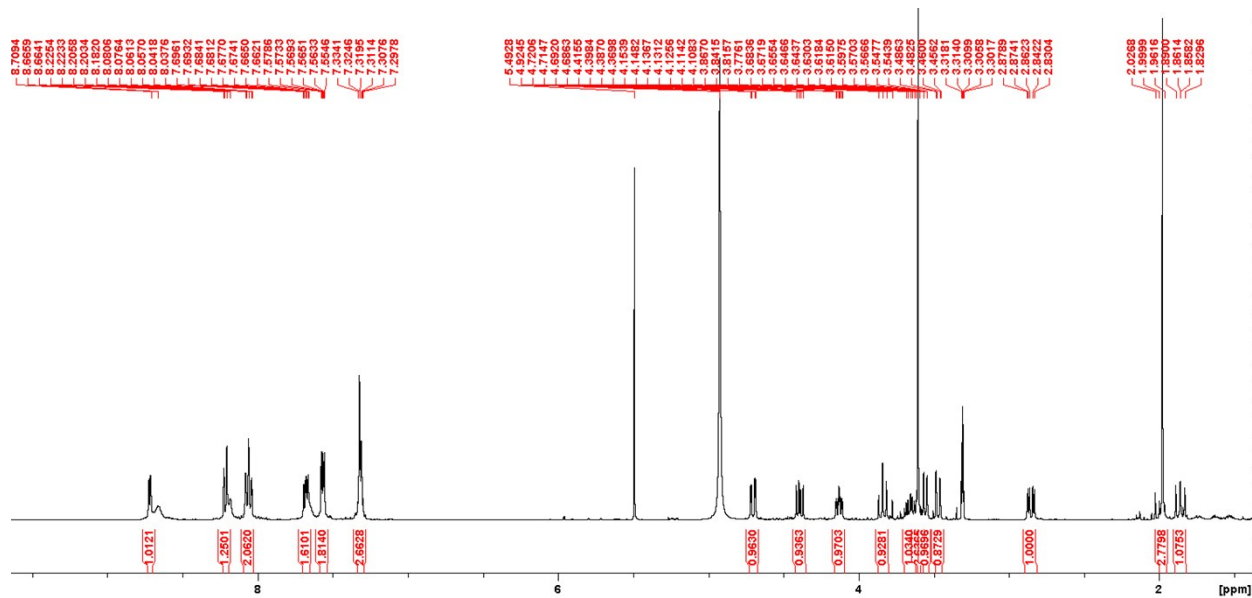

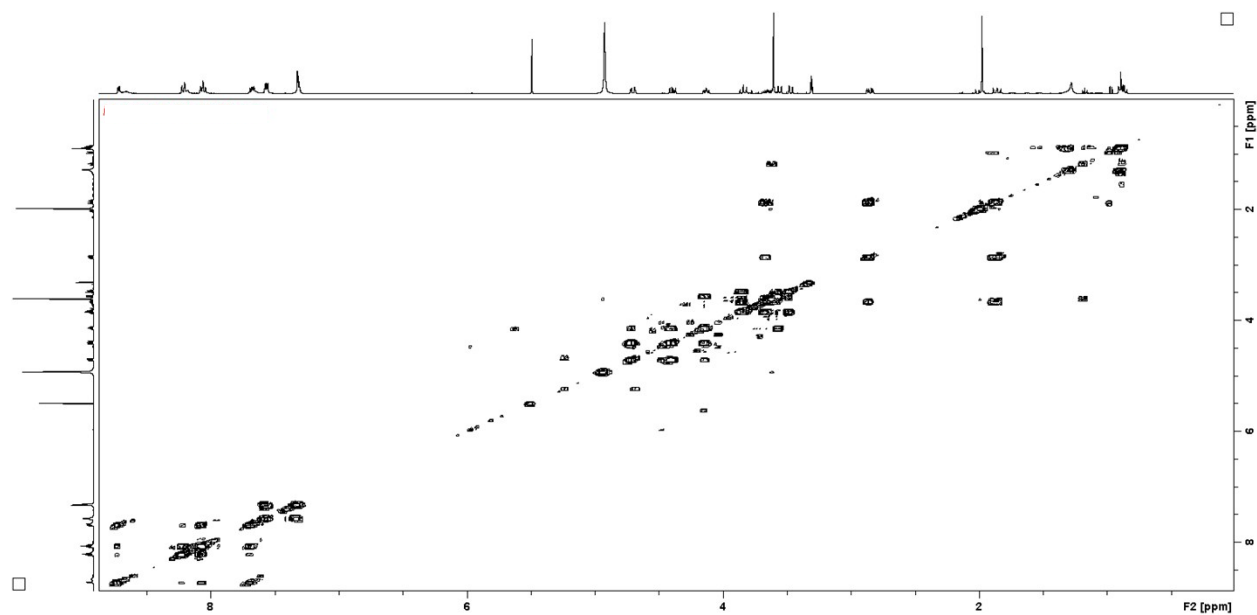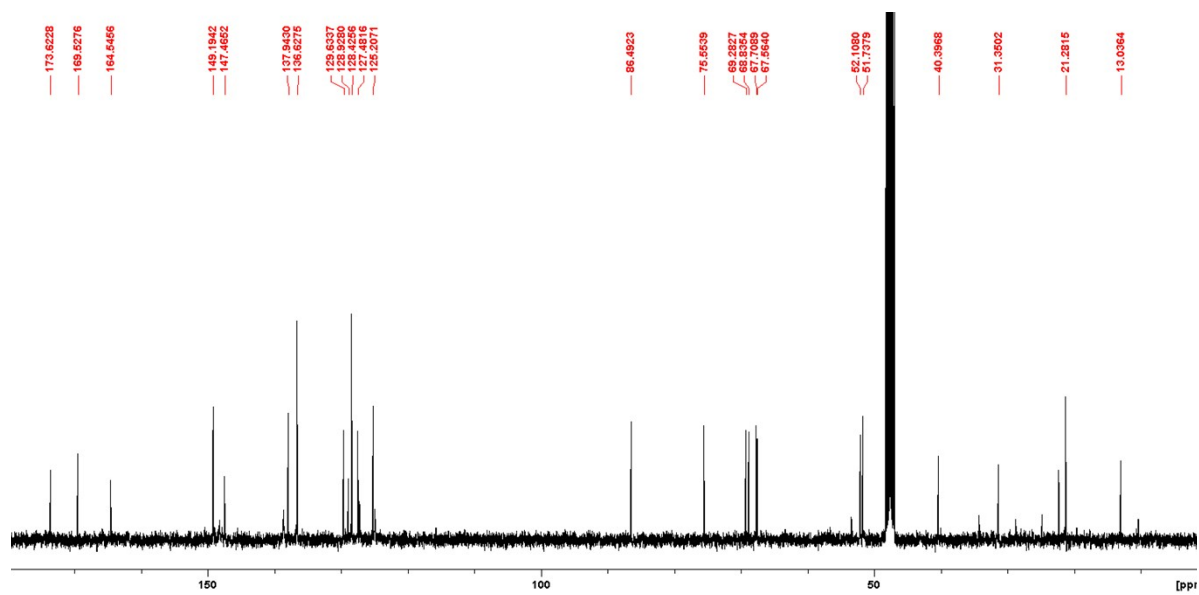

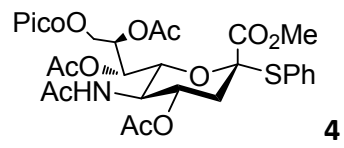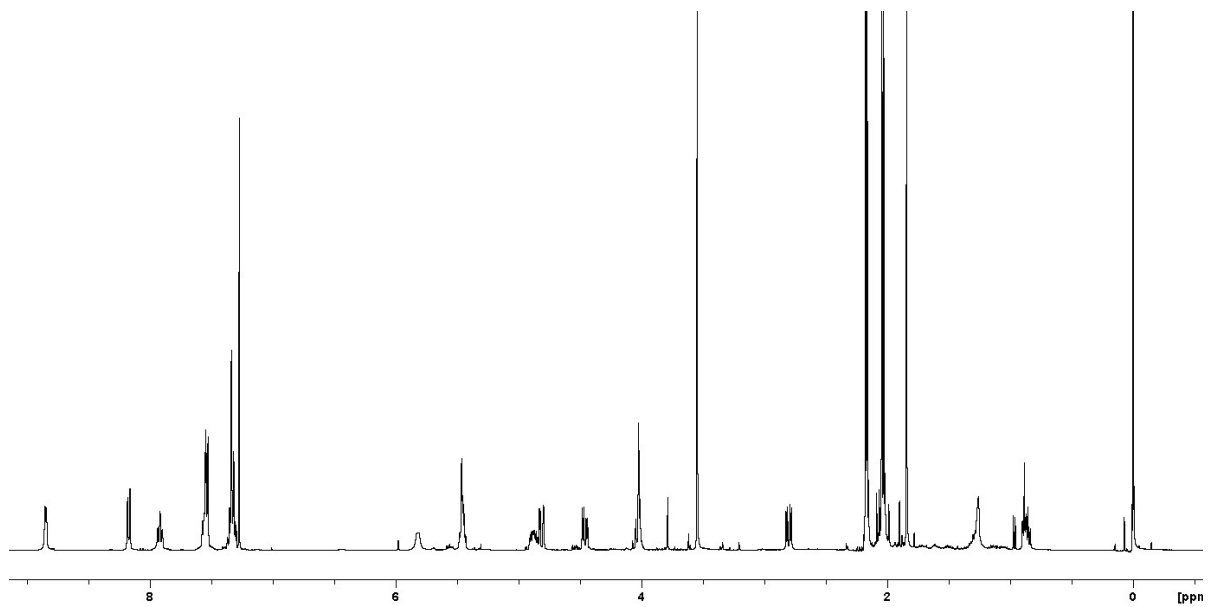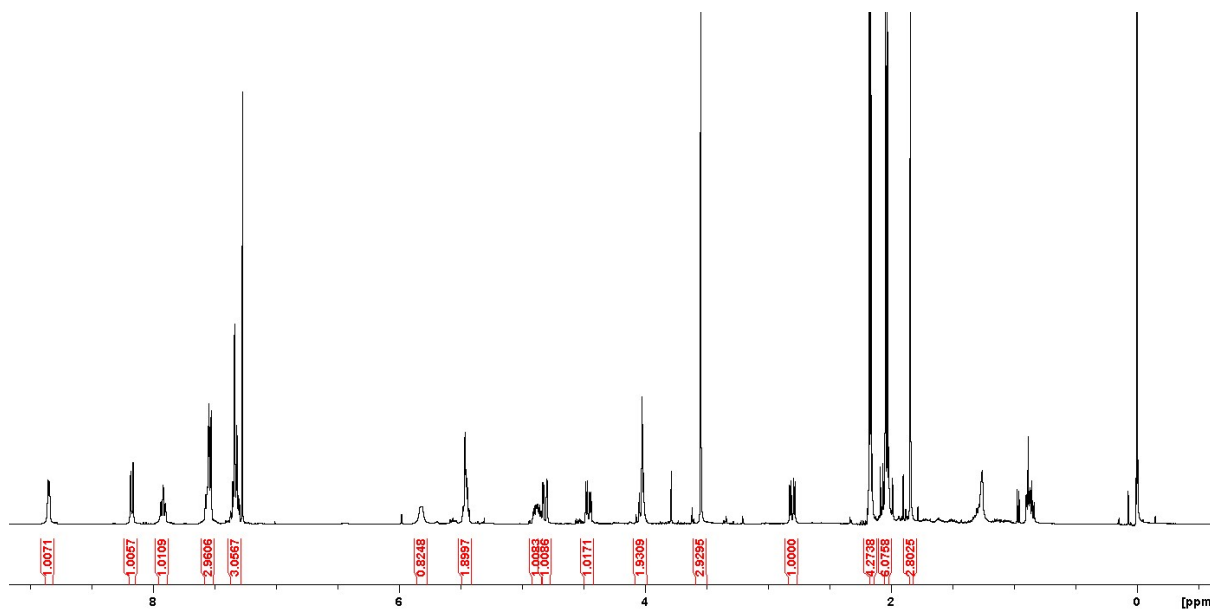

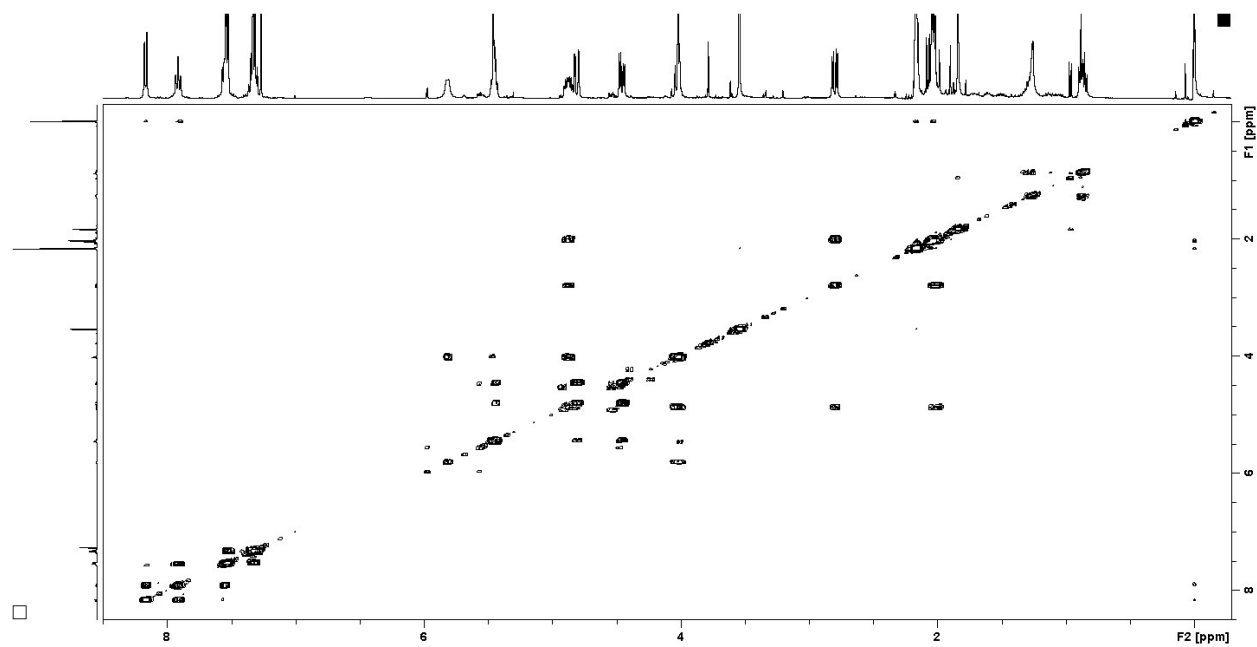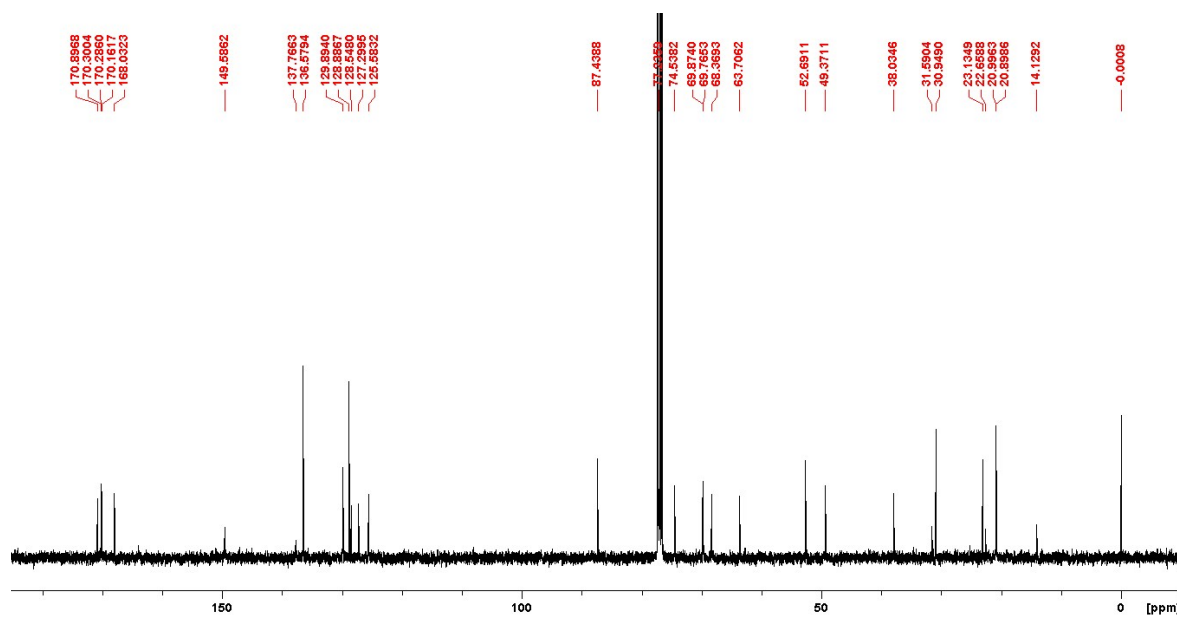



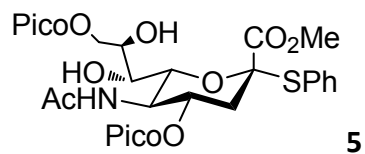

5

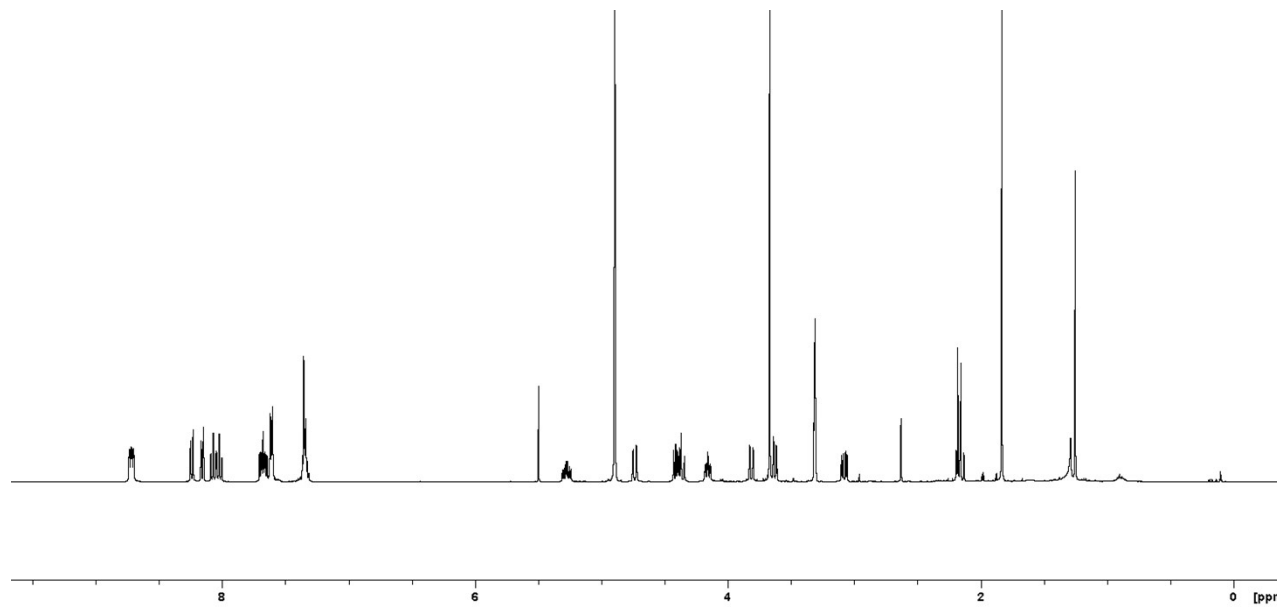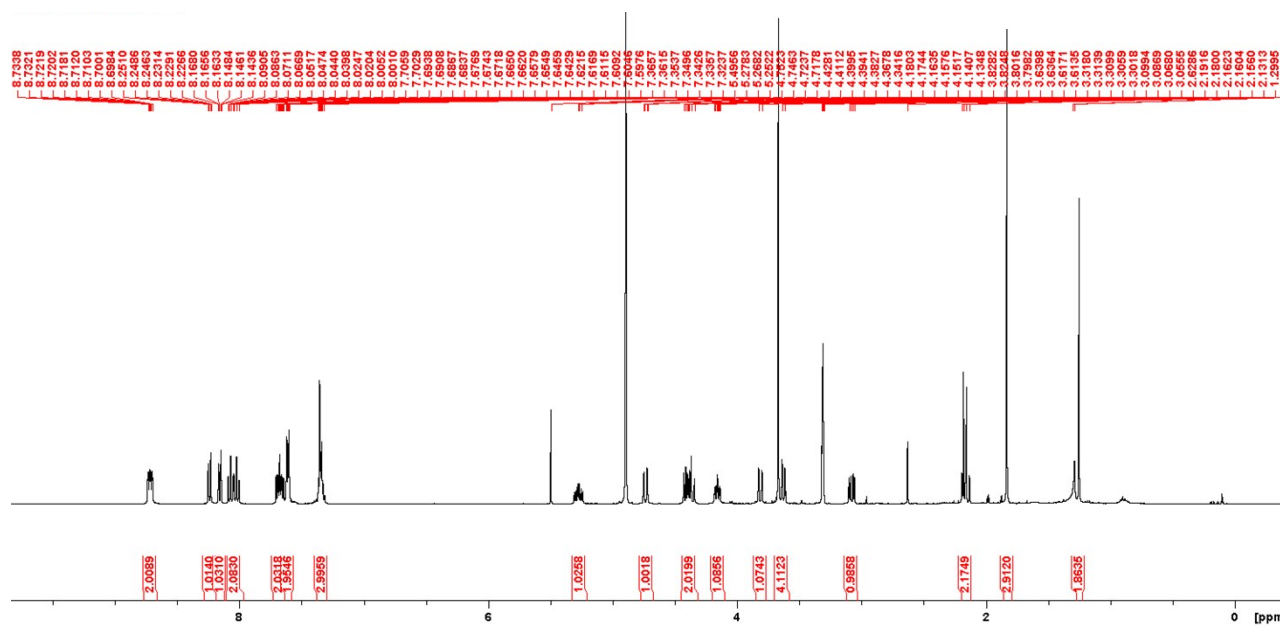

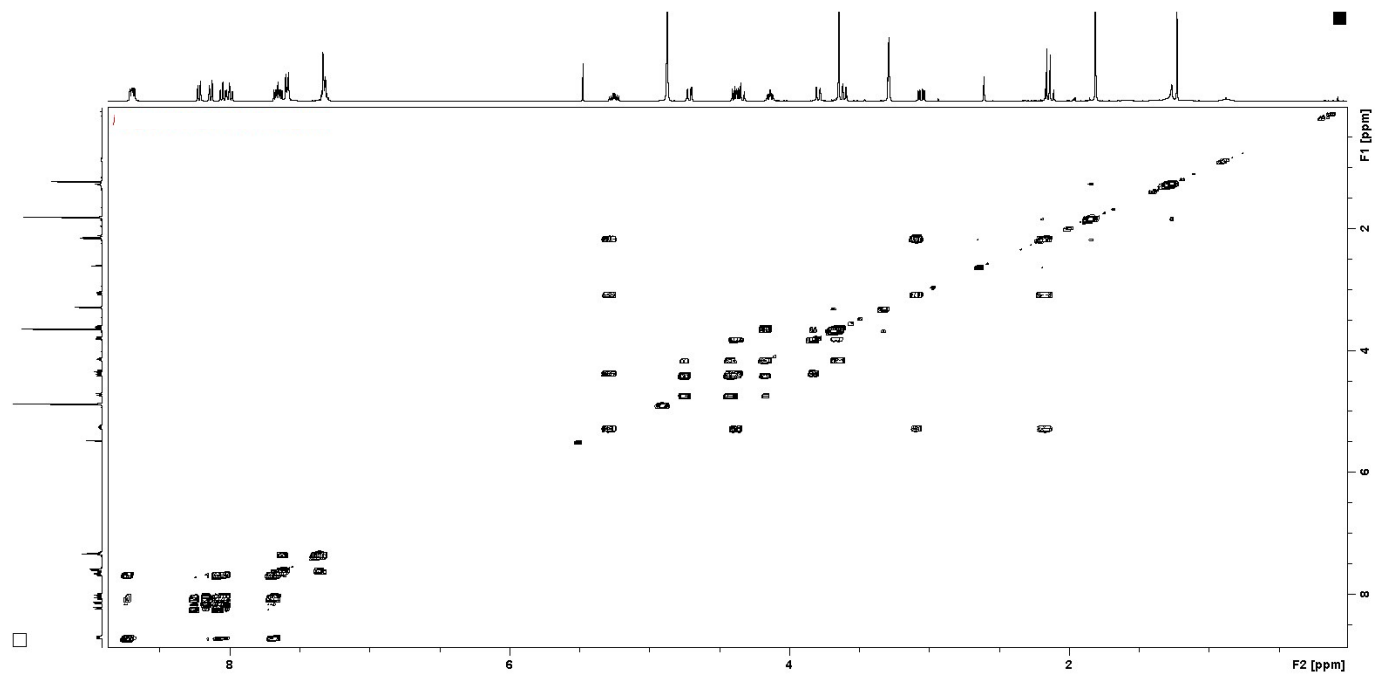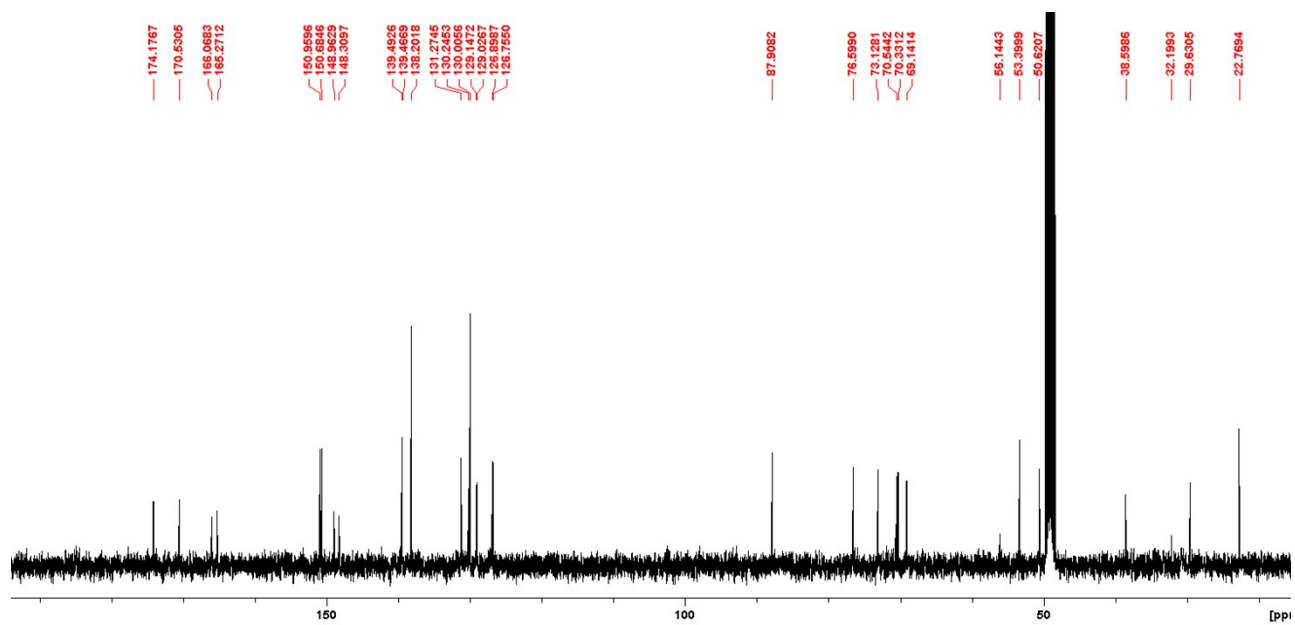

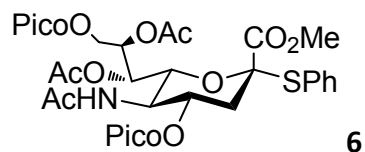

6

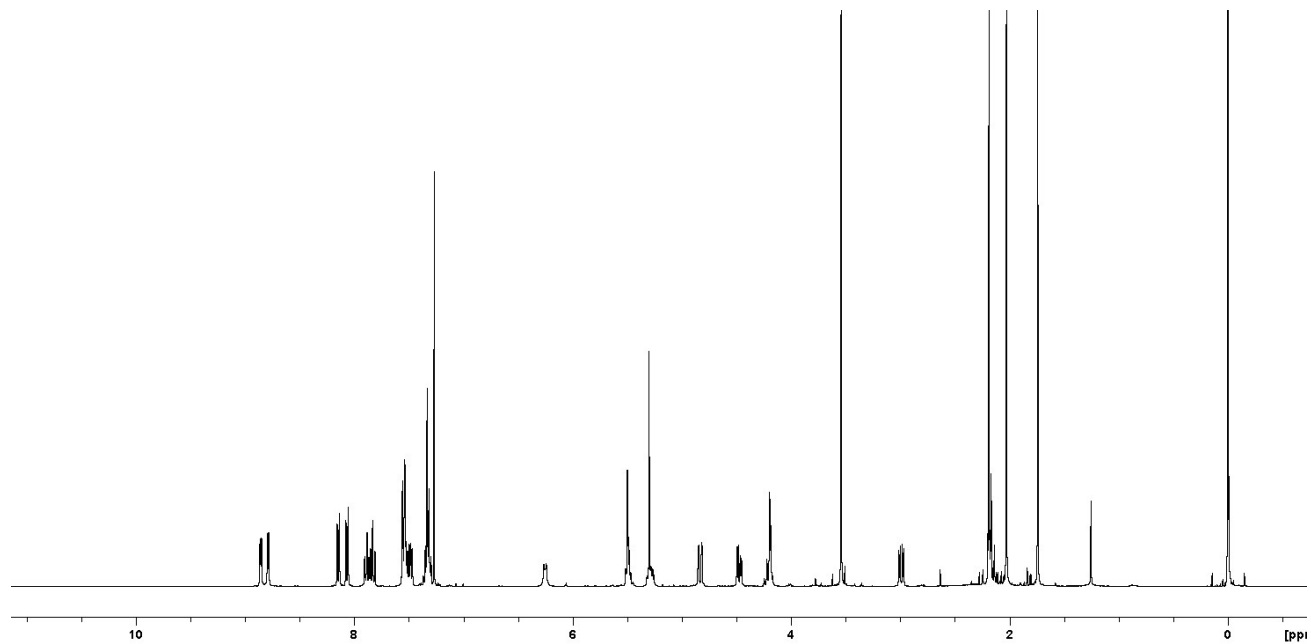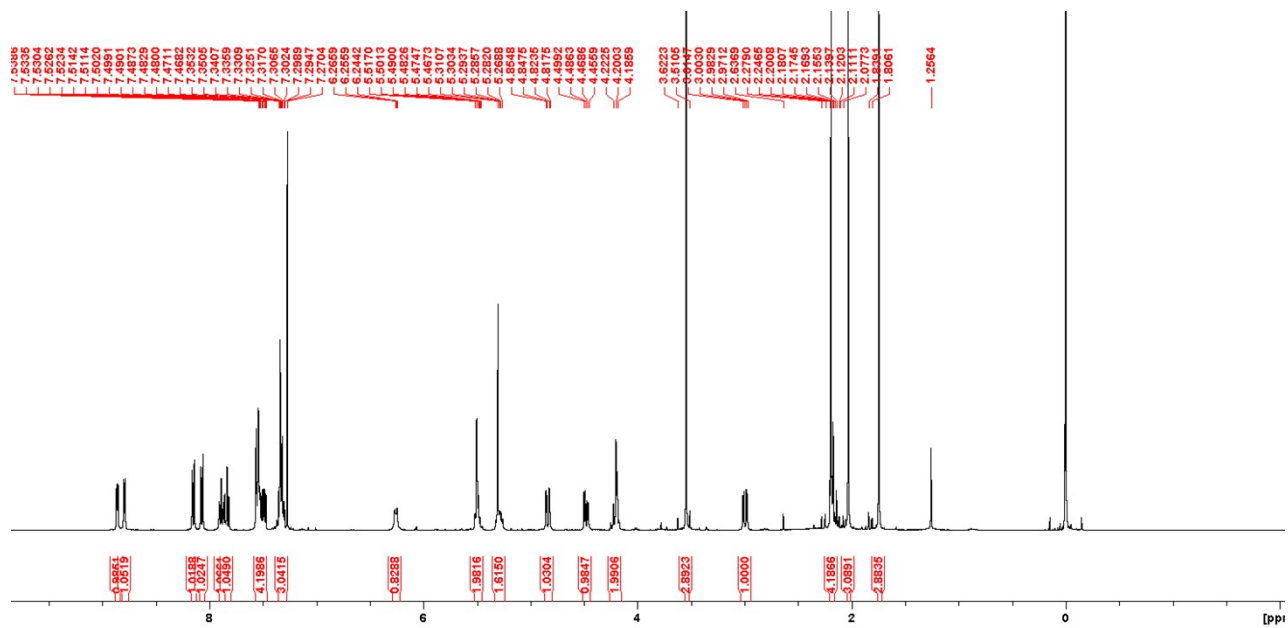

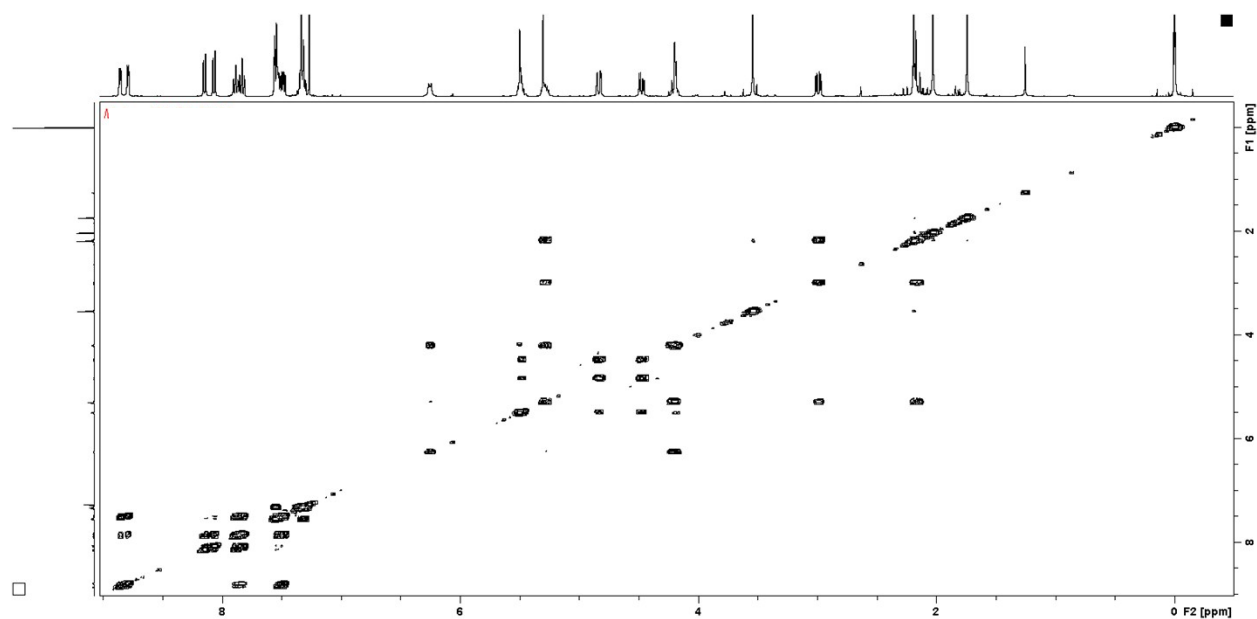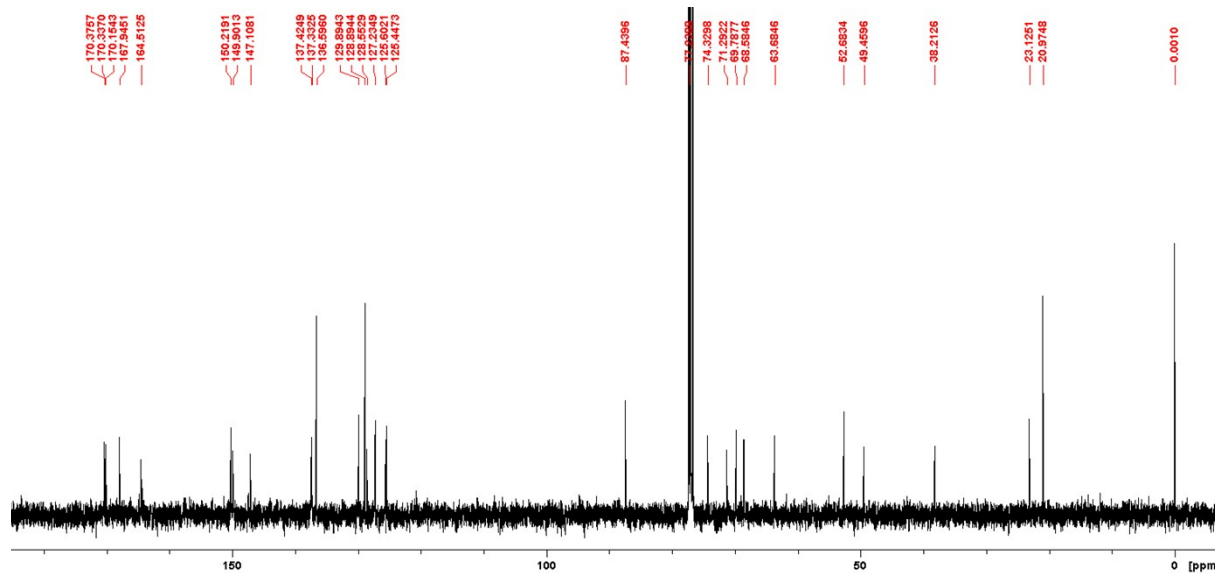

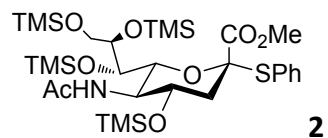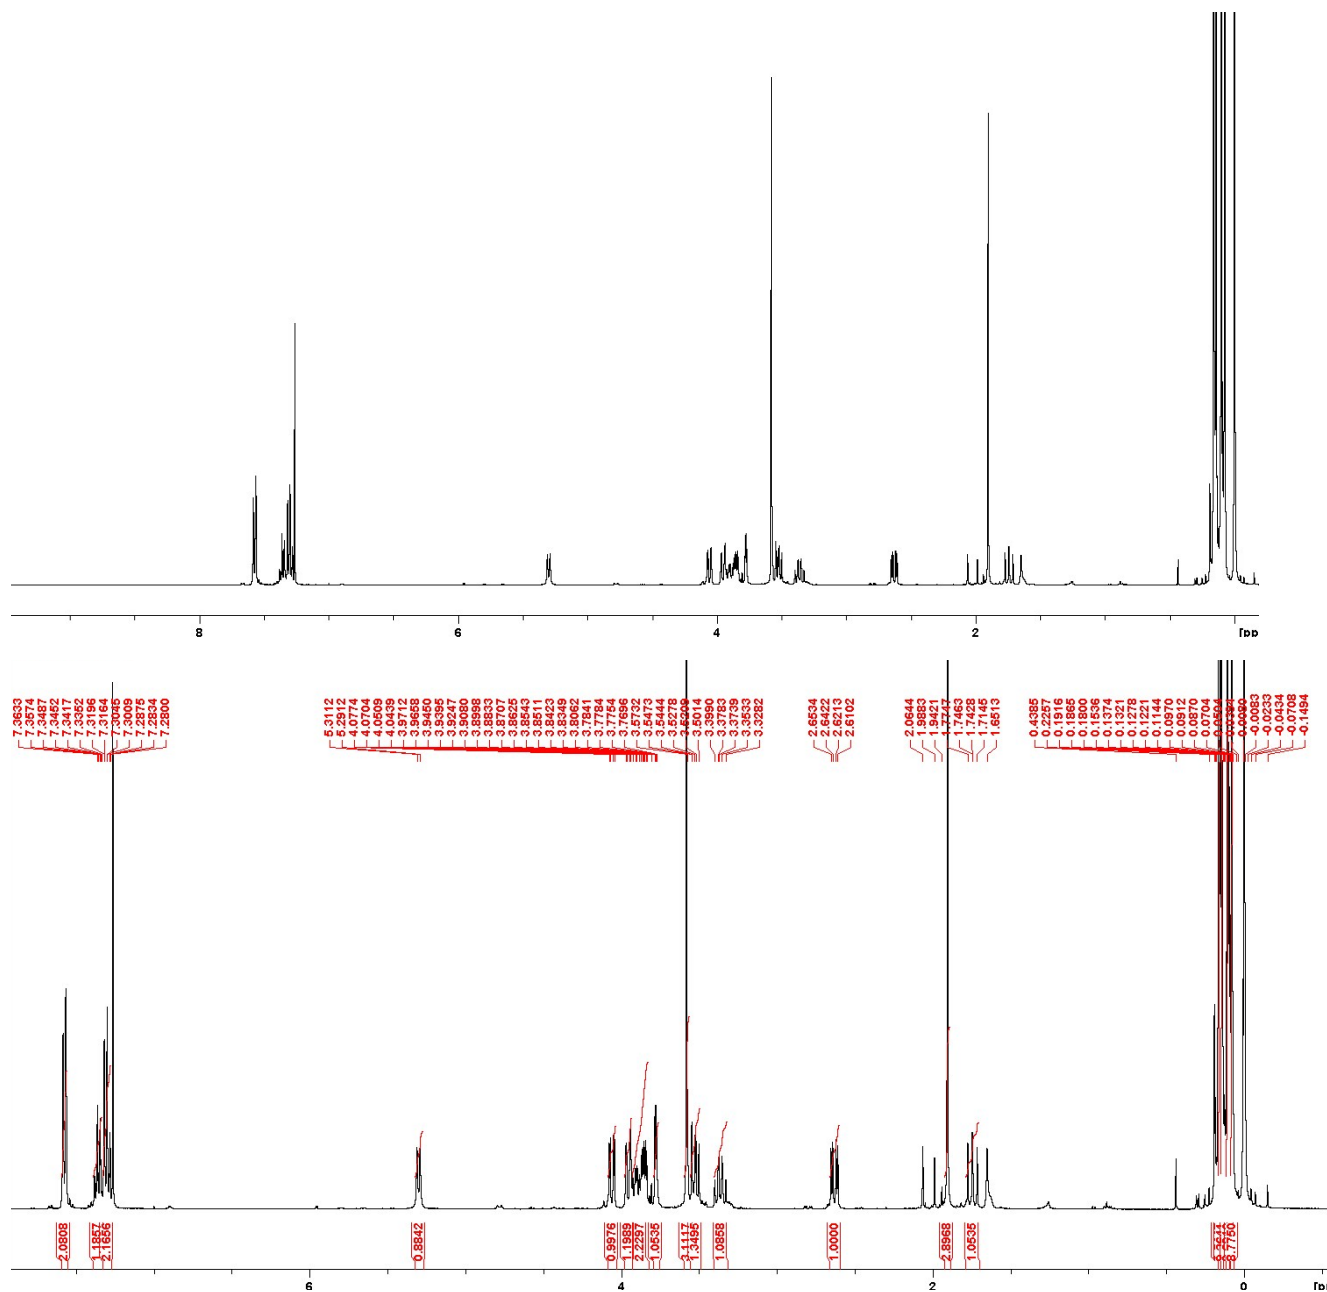

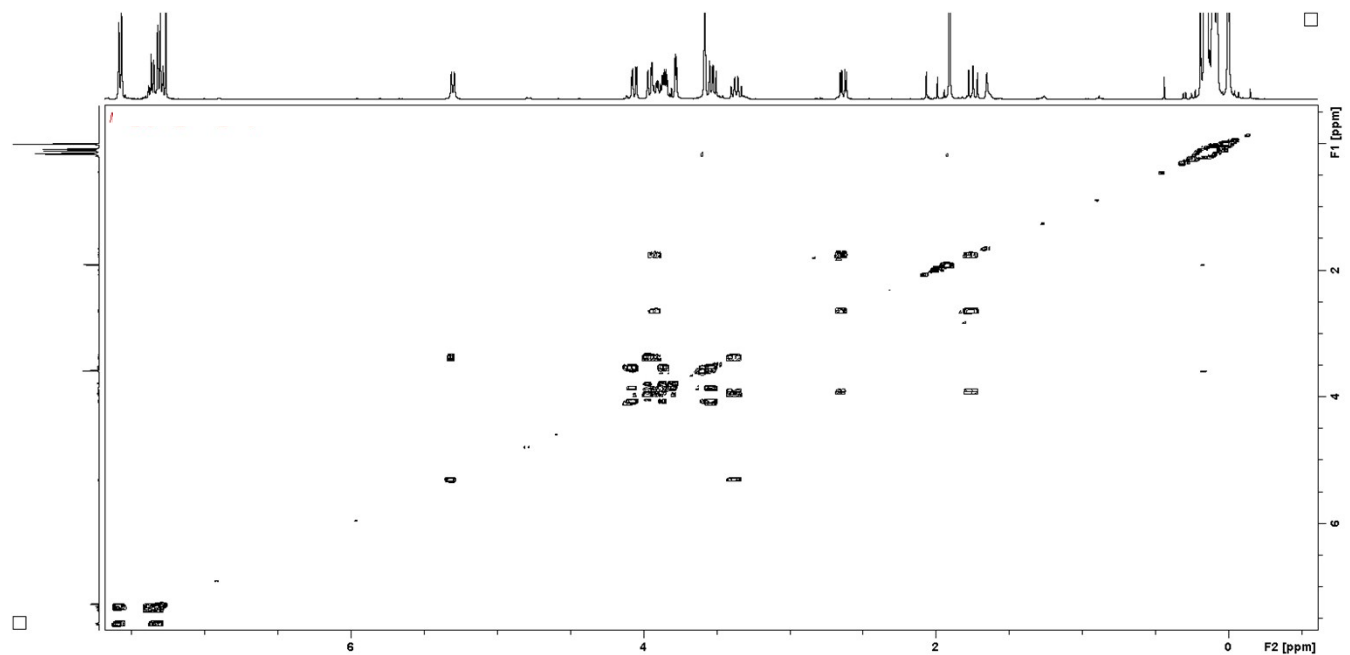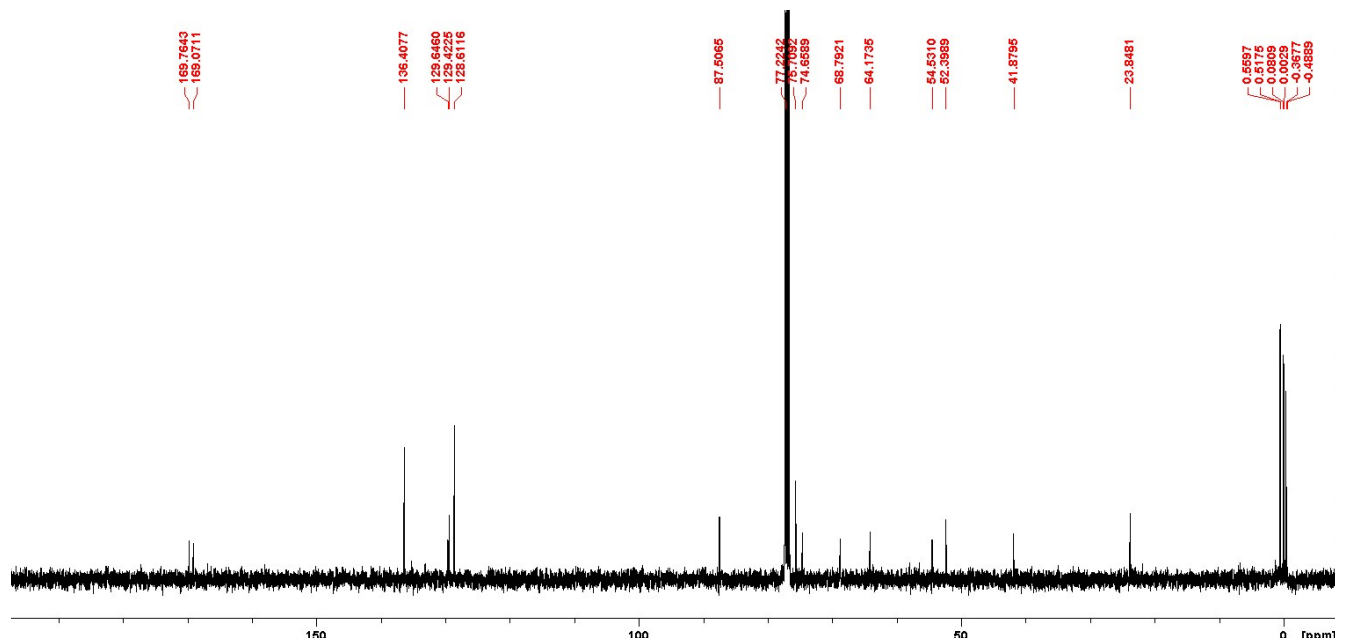

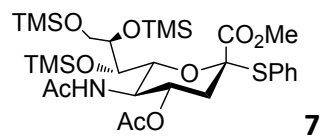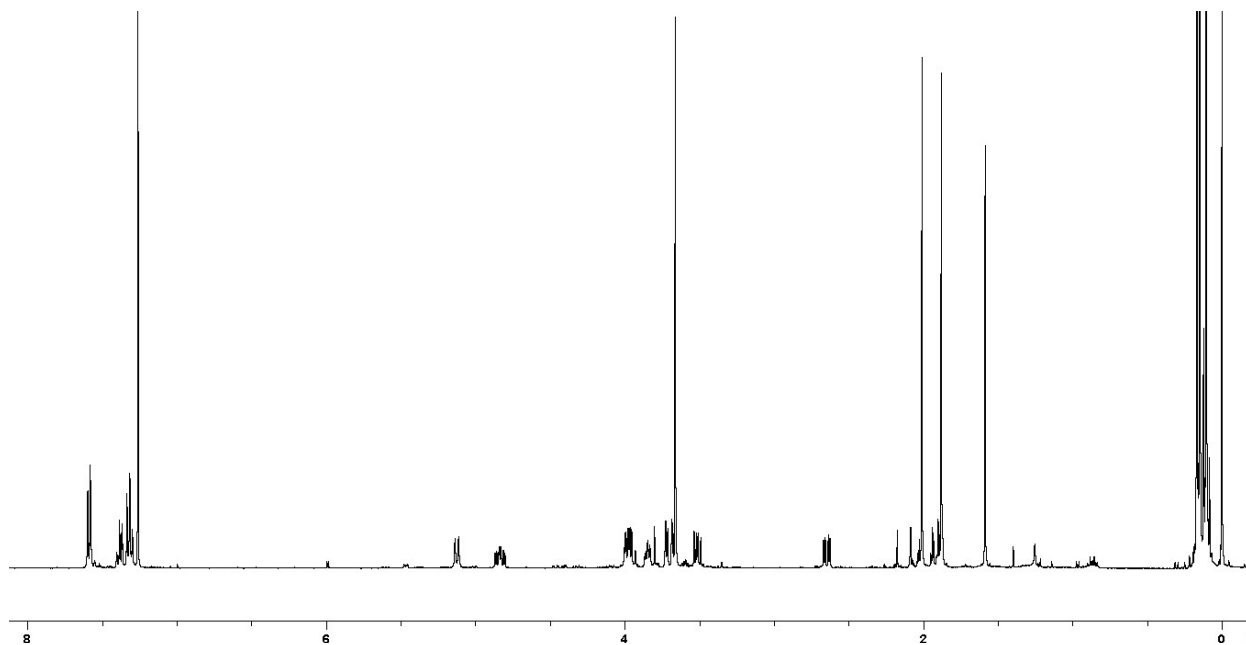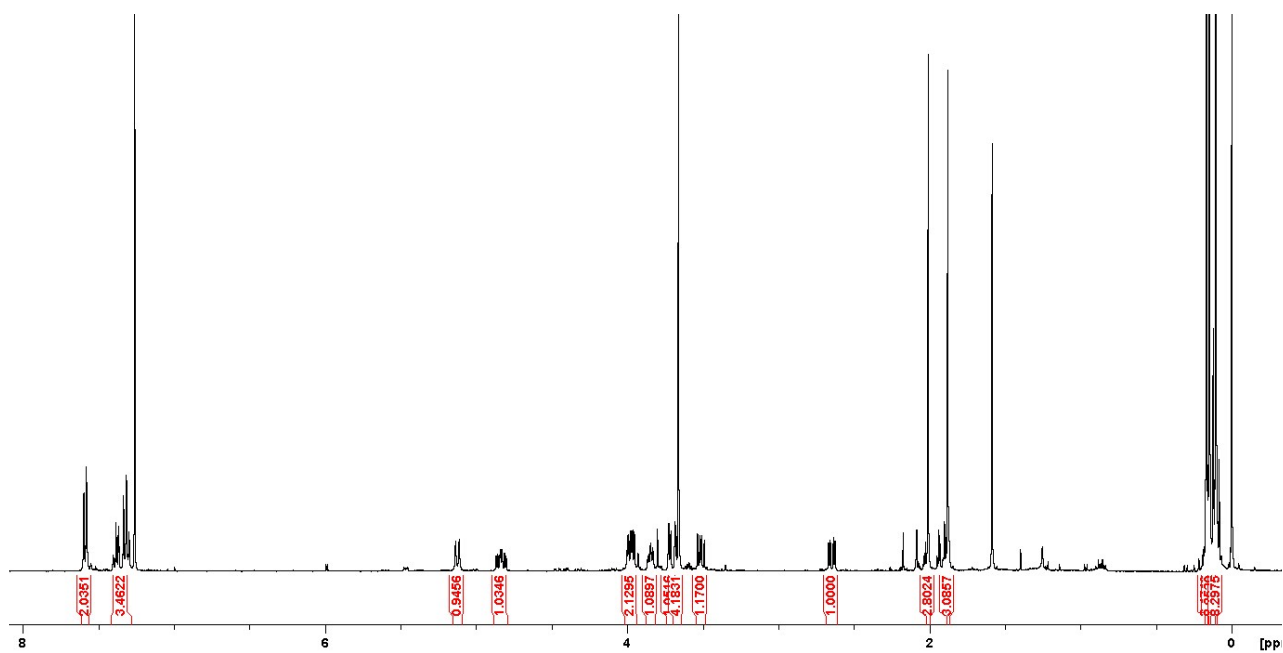

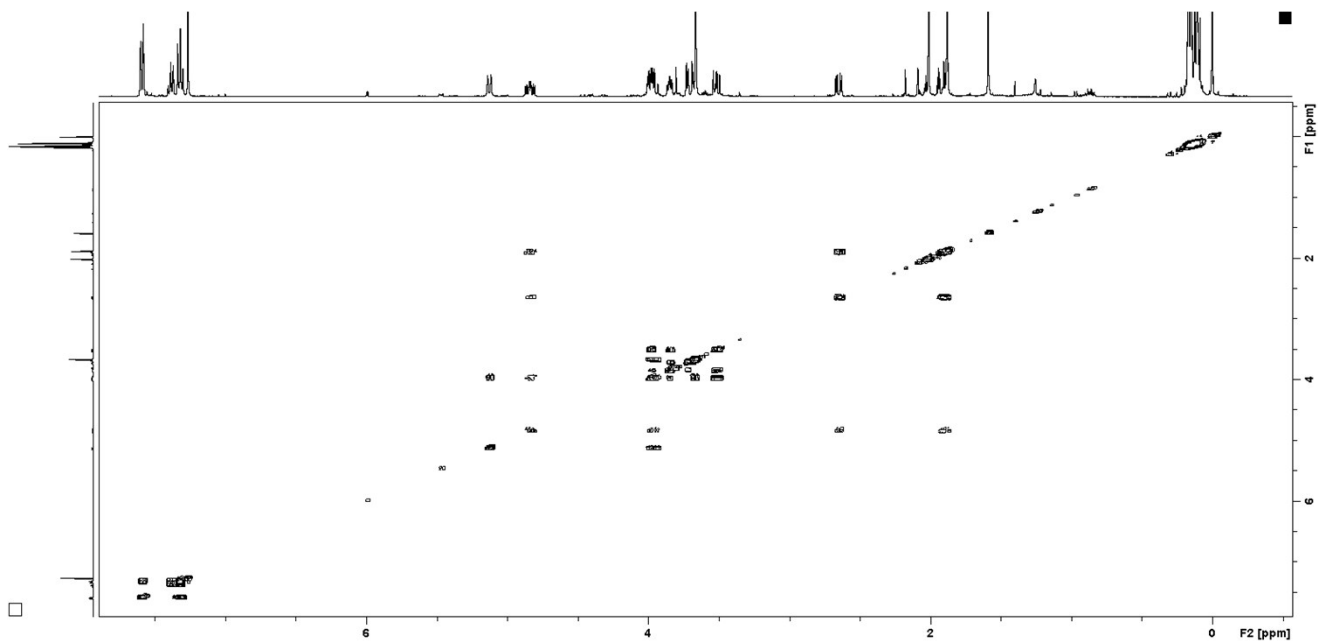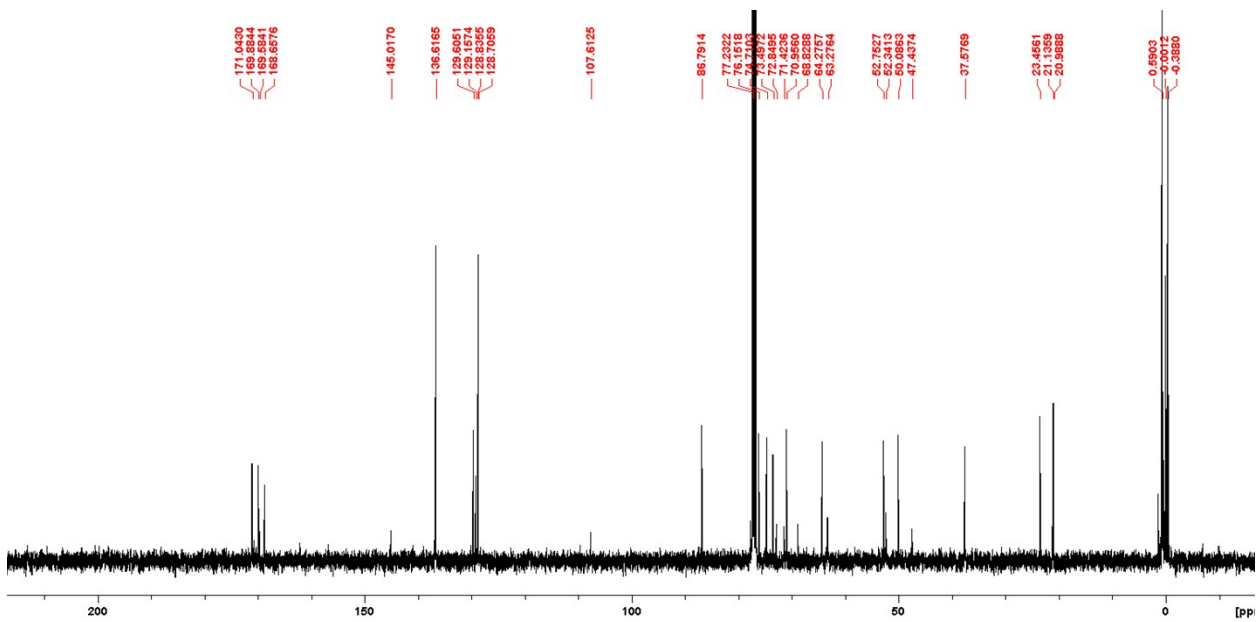



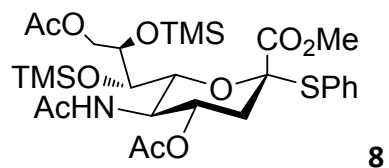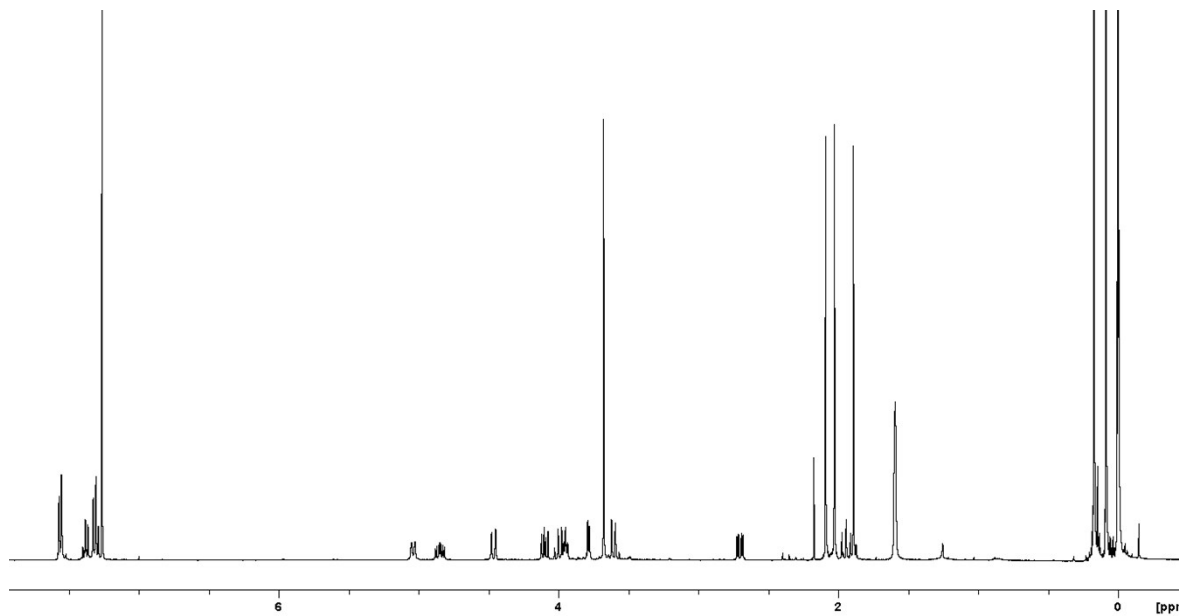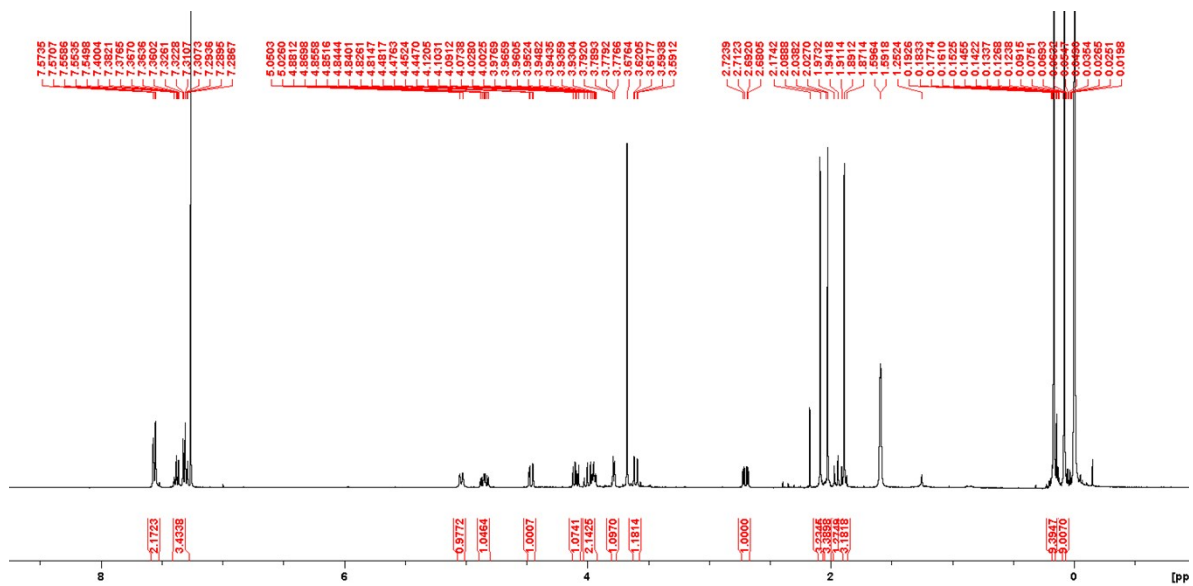

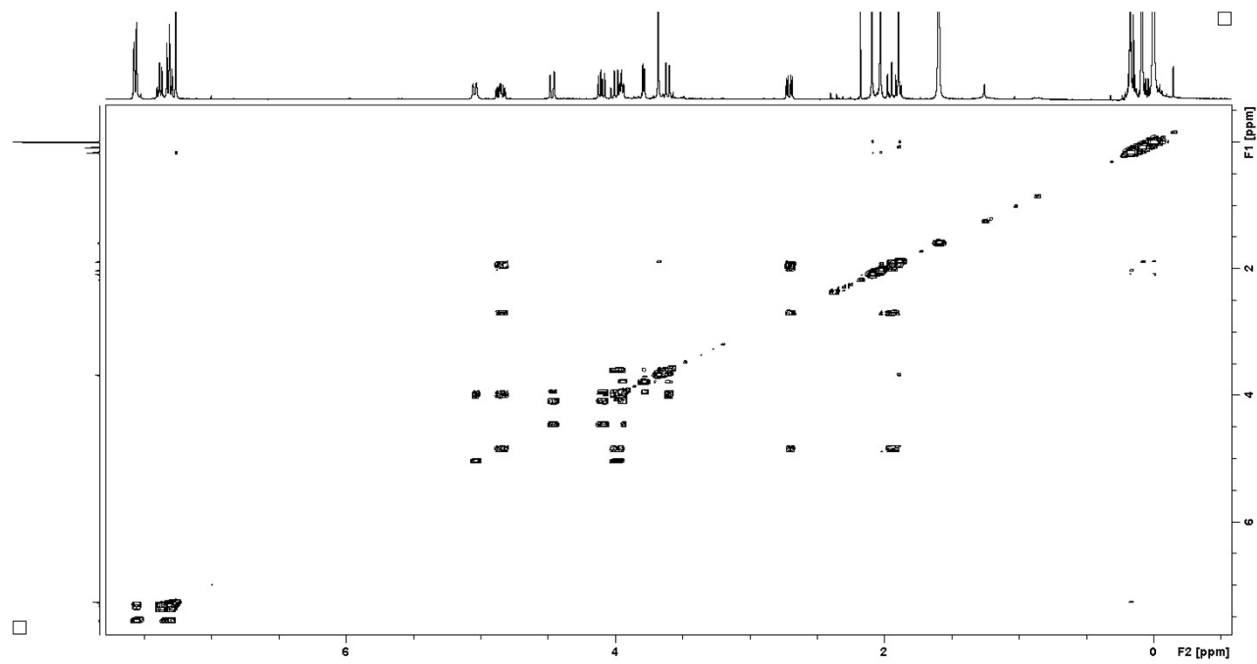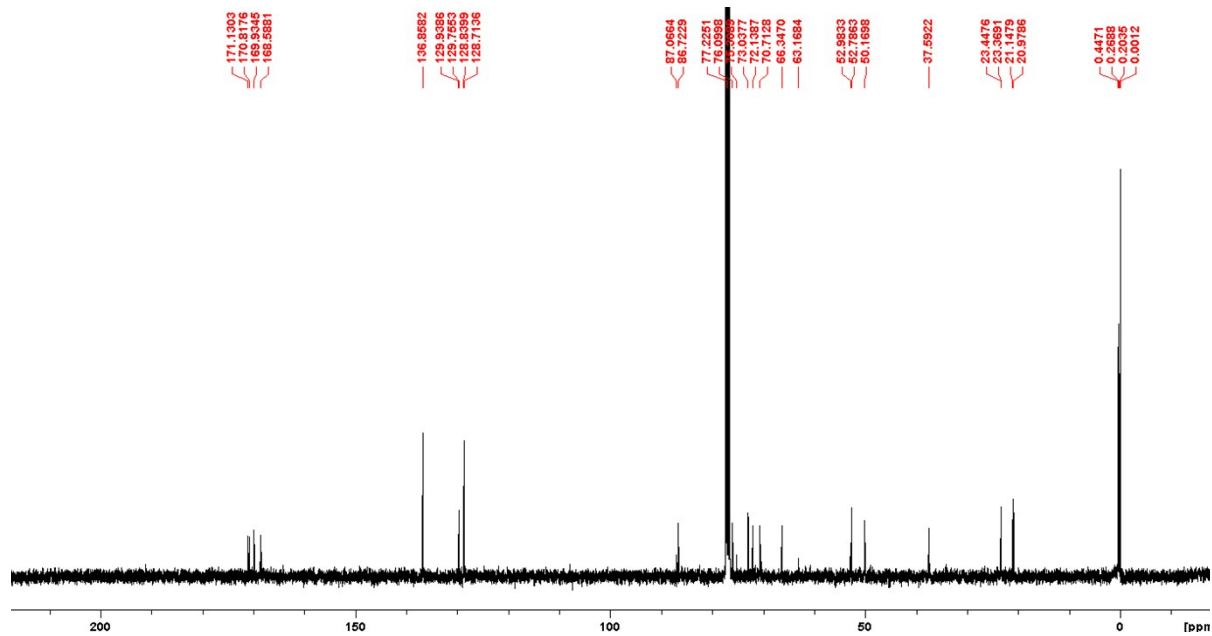

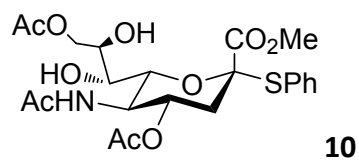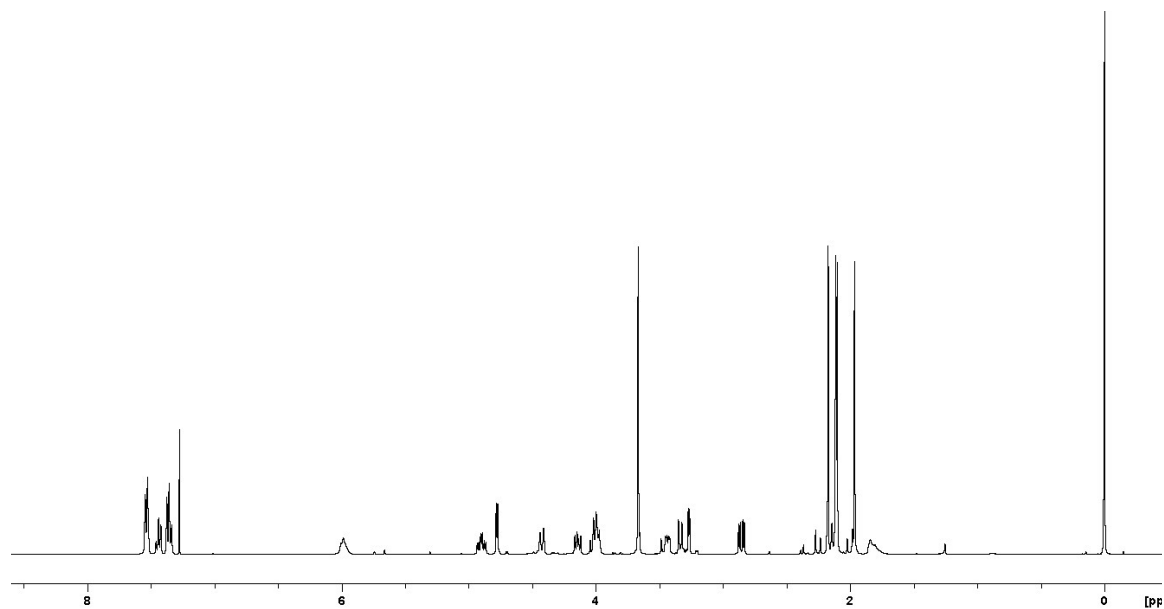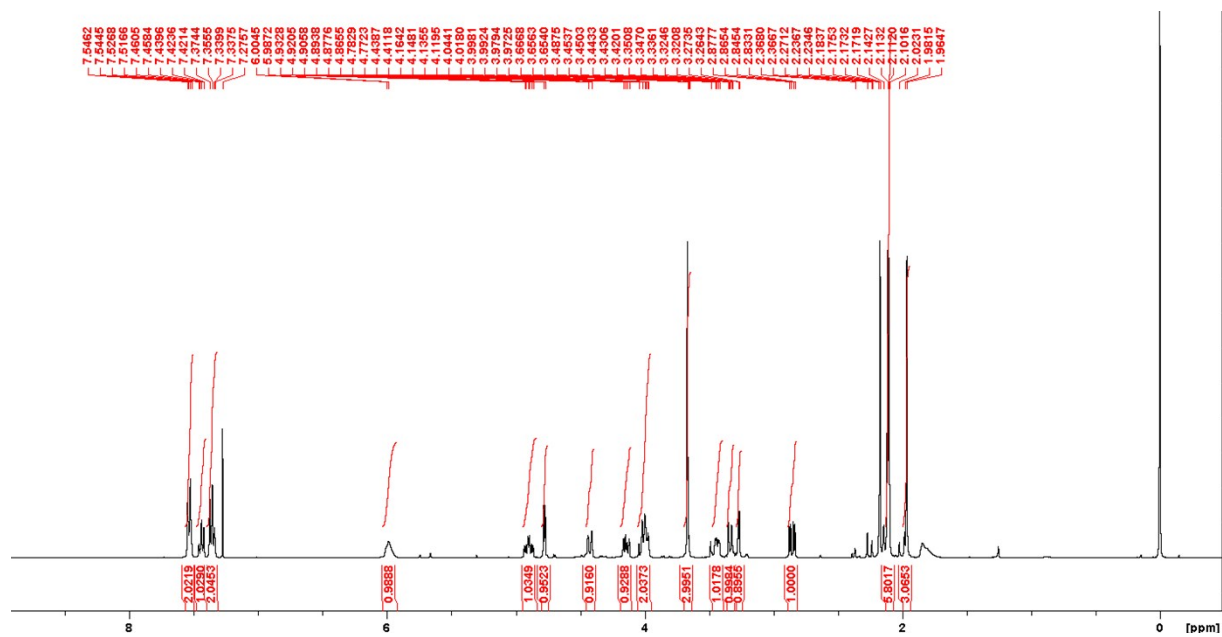

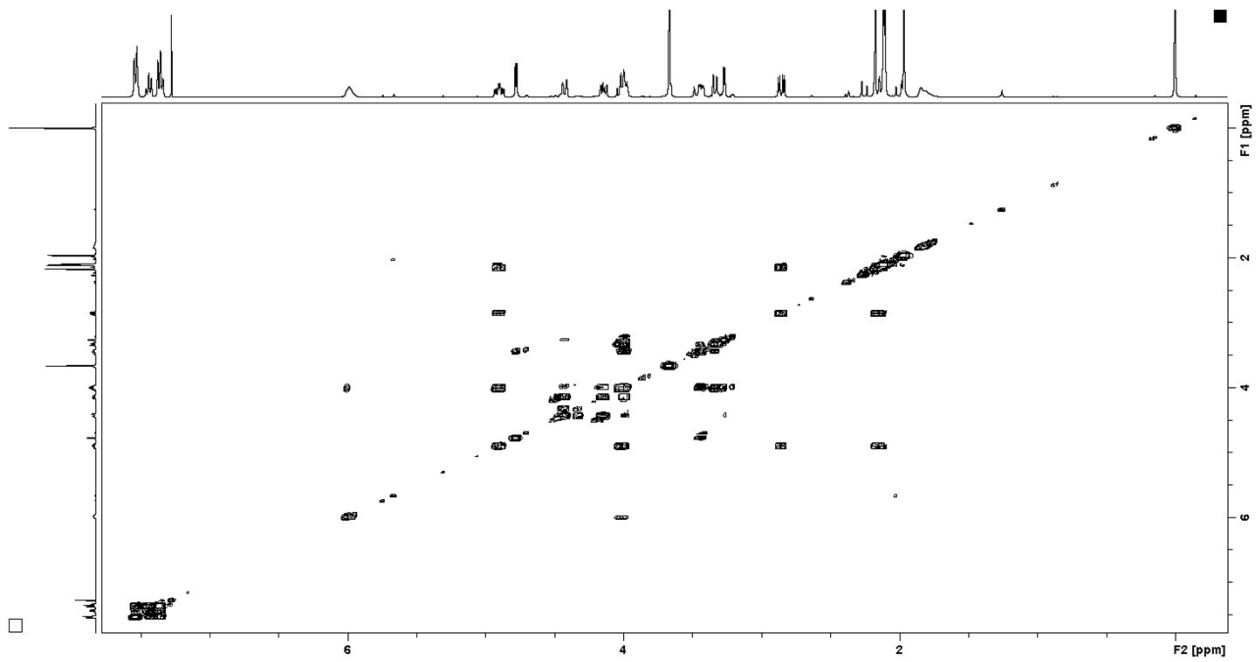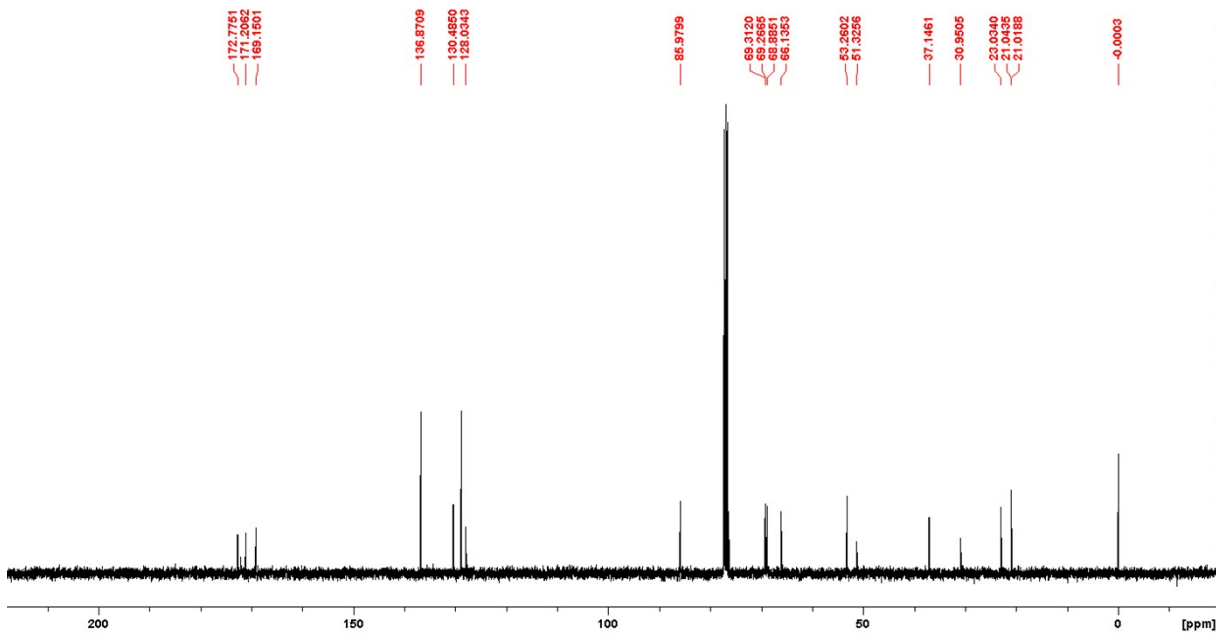

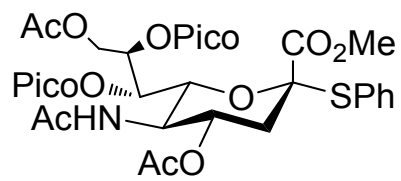

11

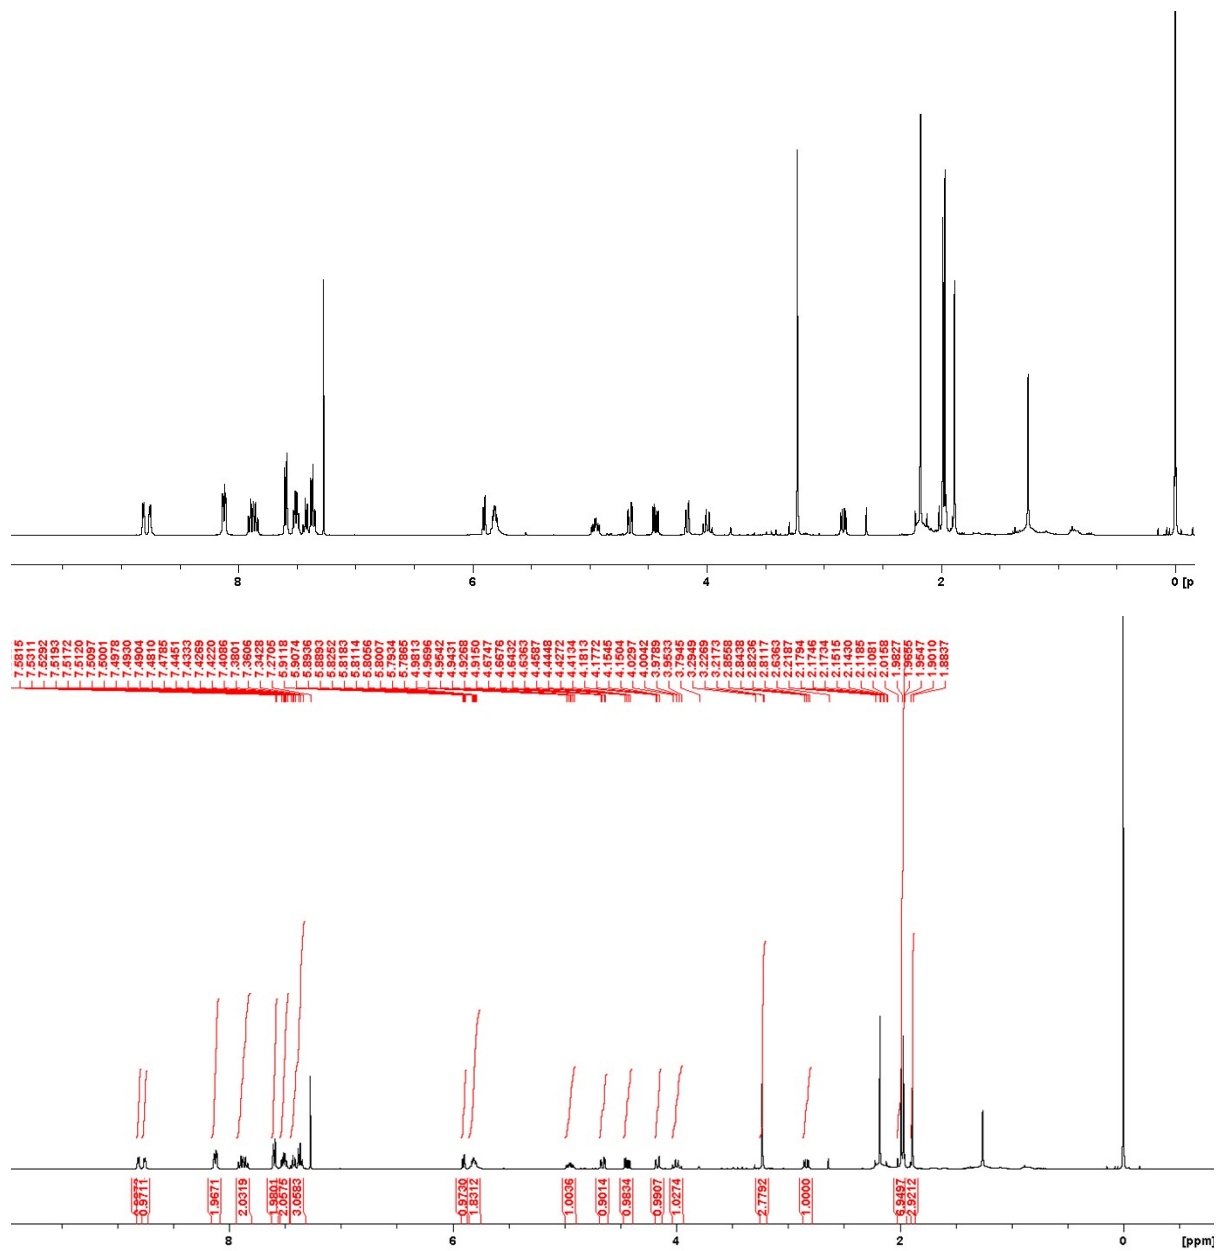

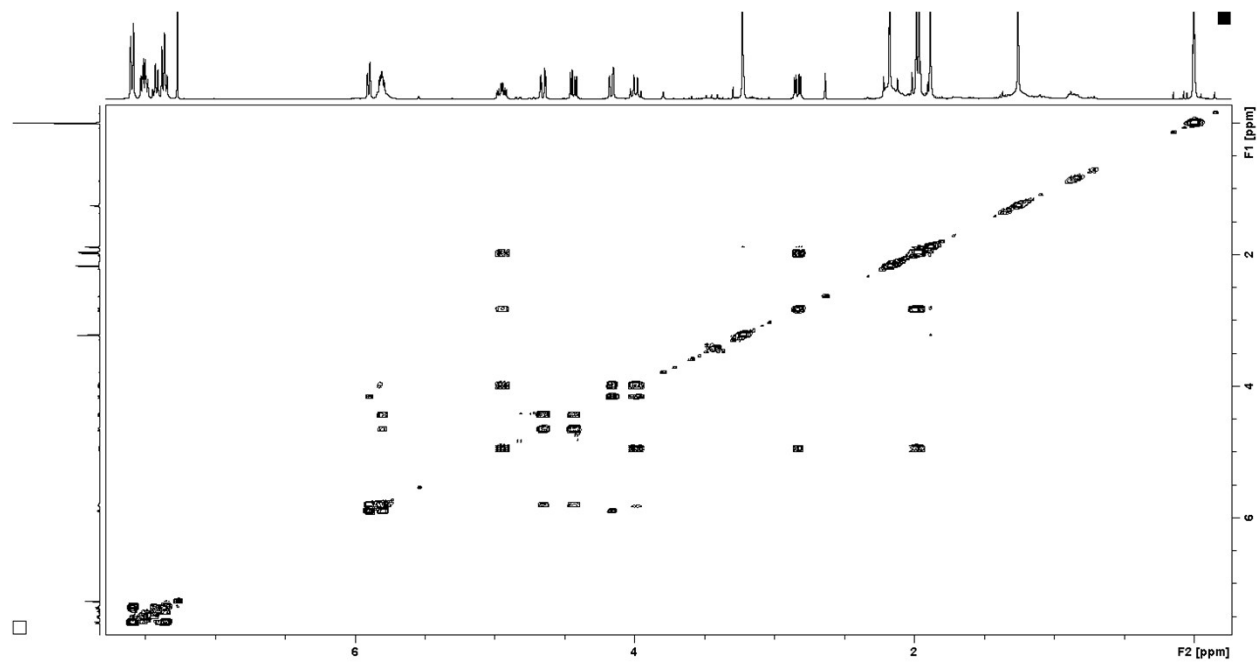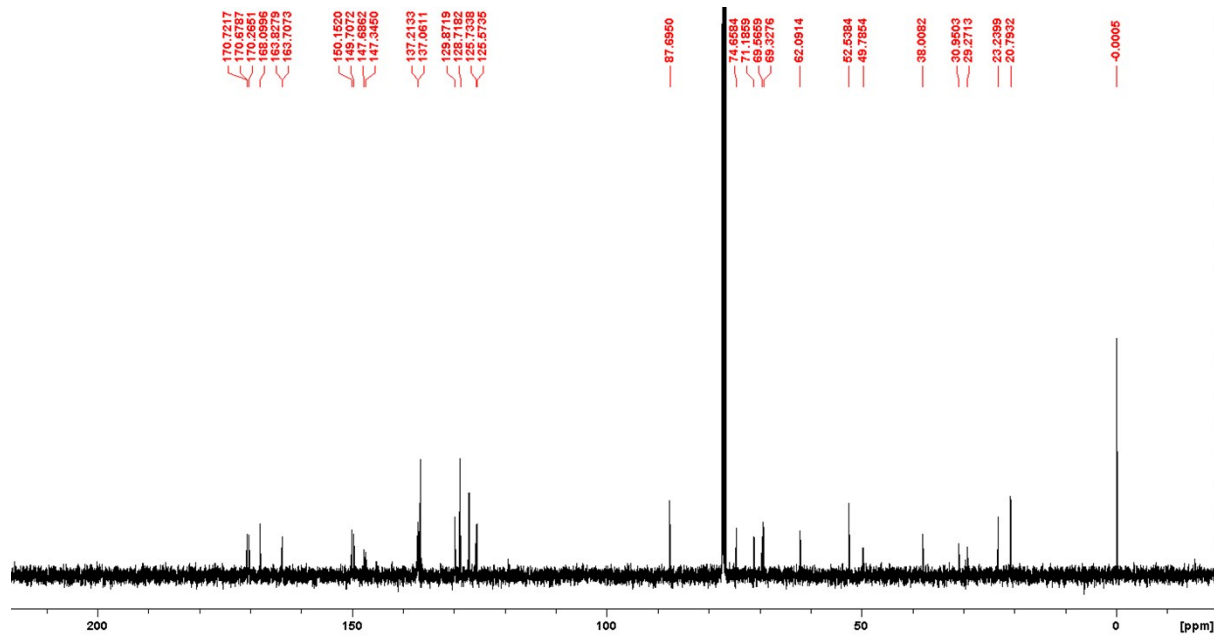

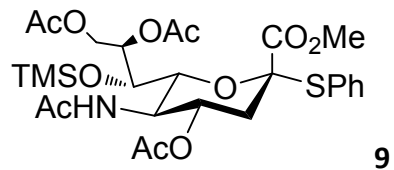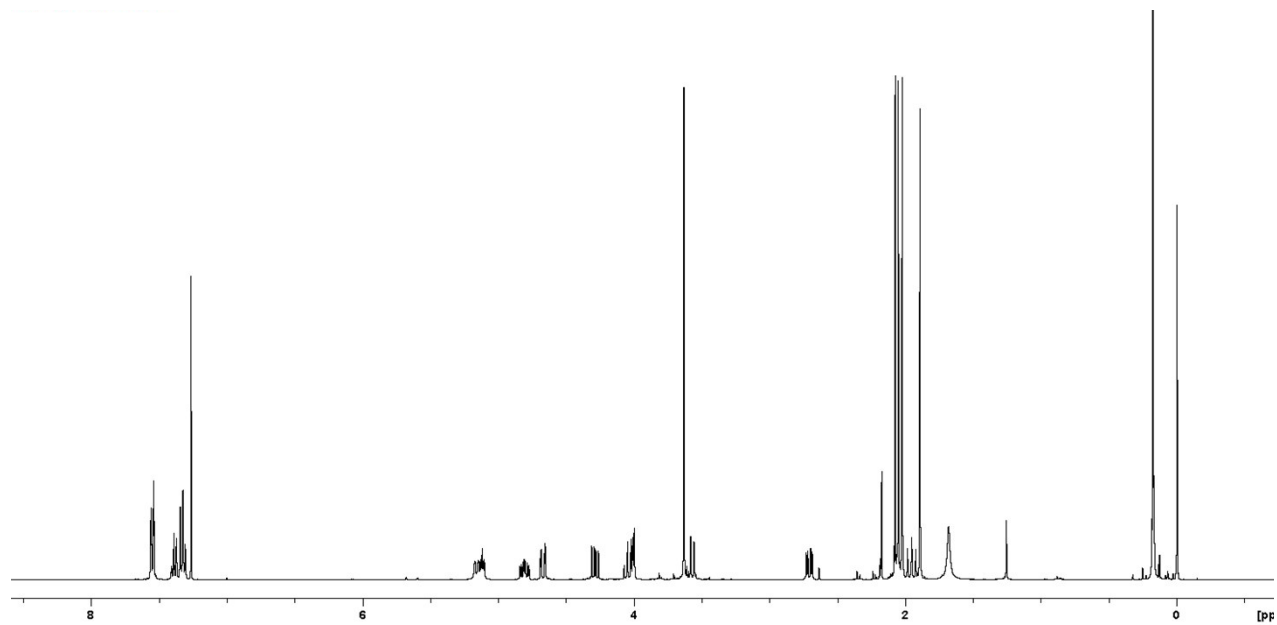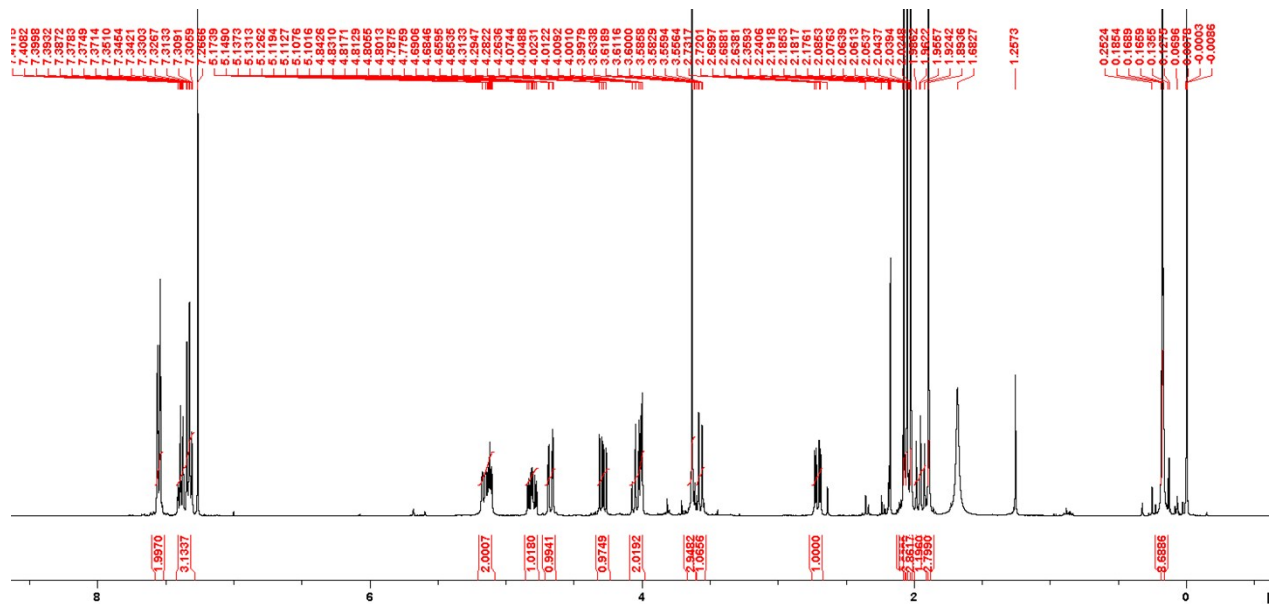

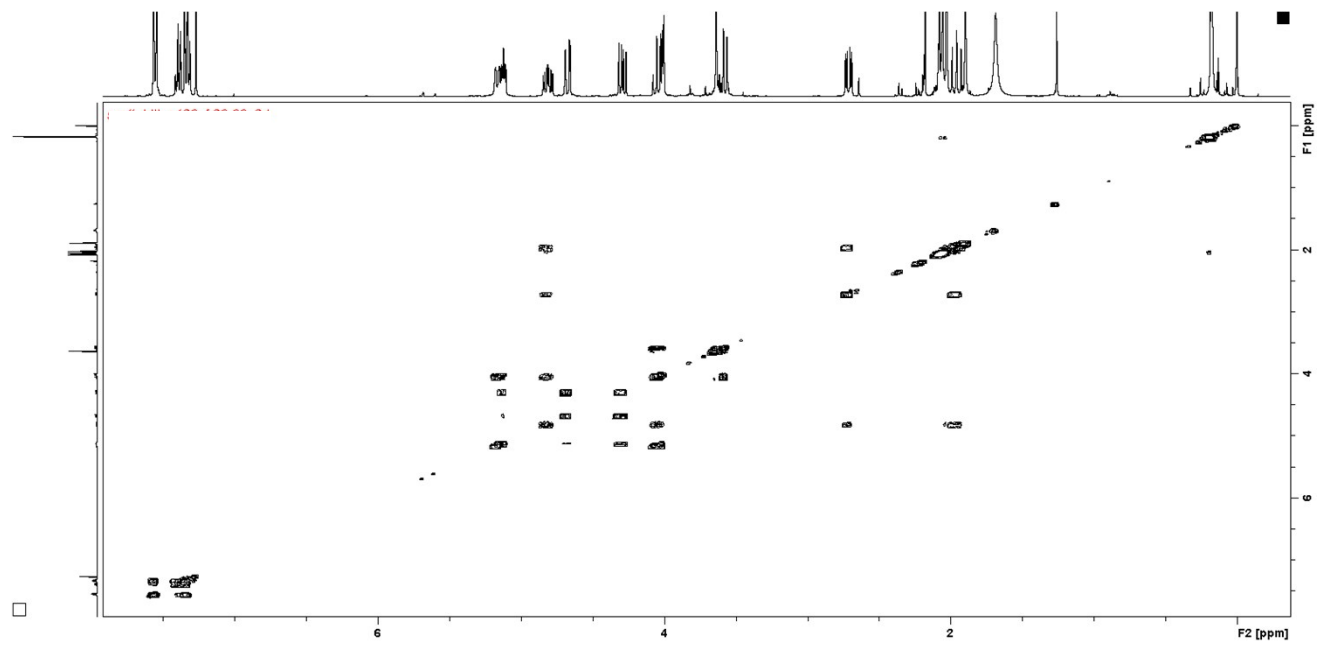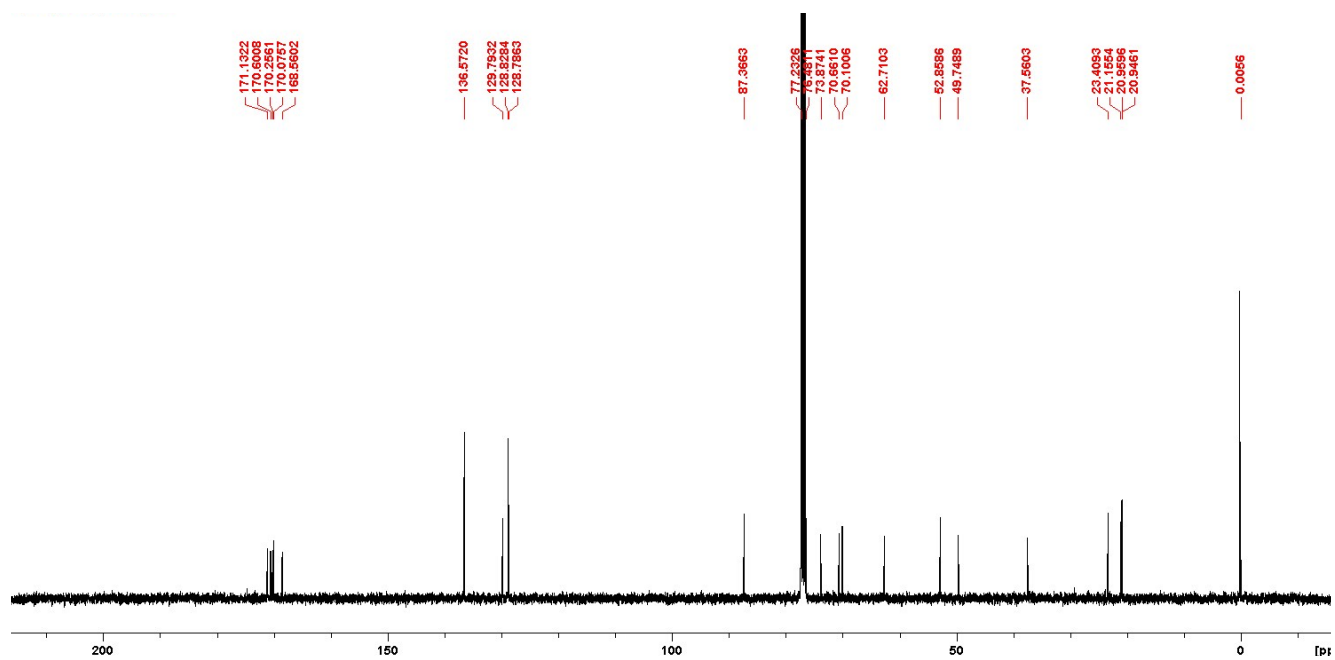



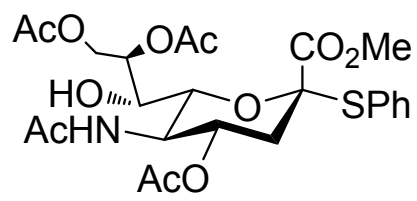

12

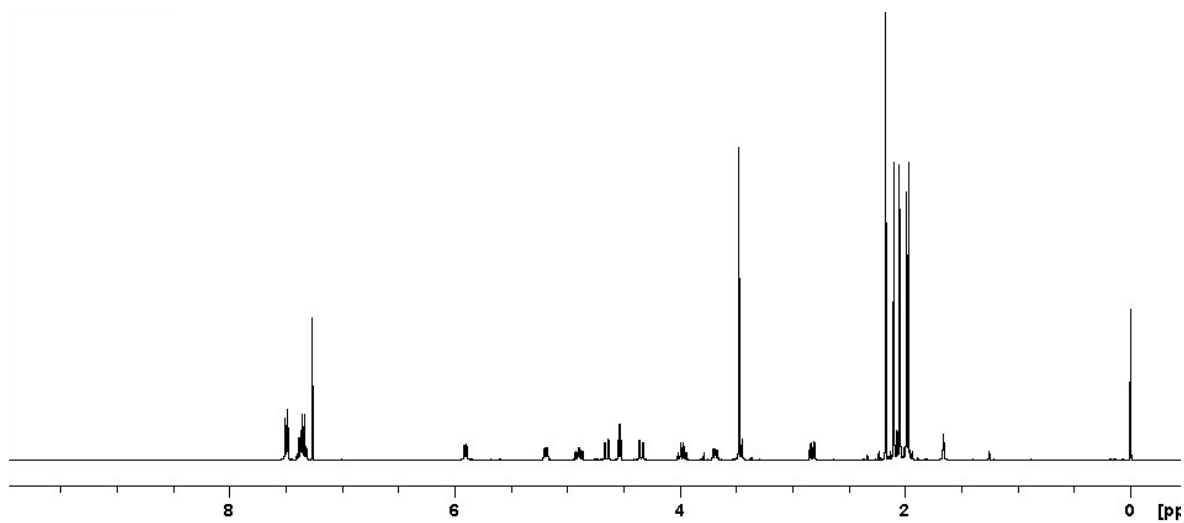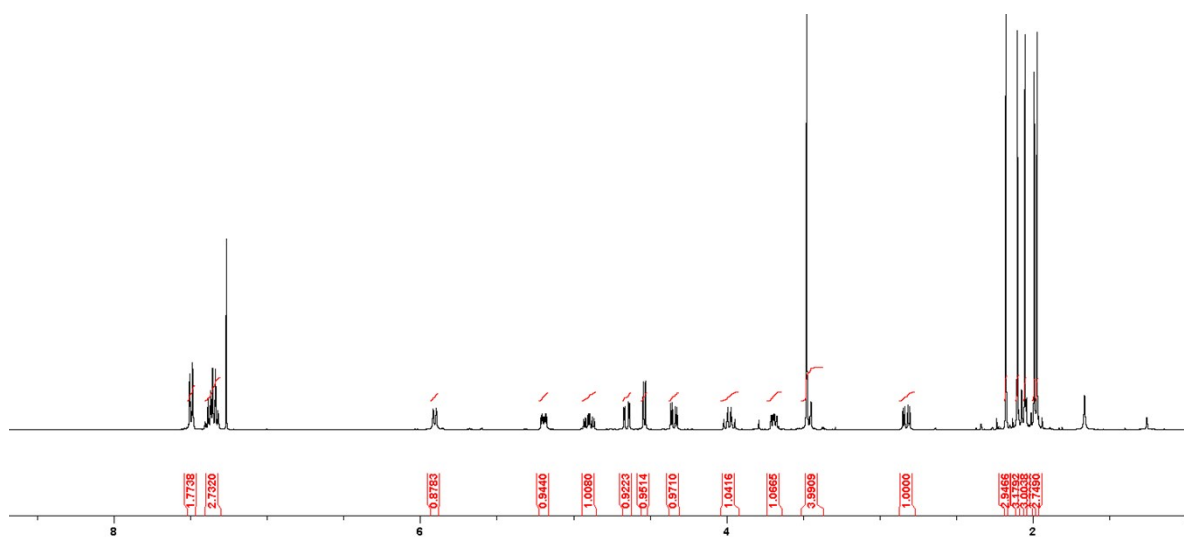

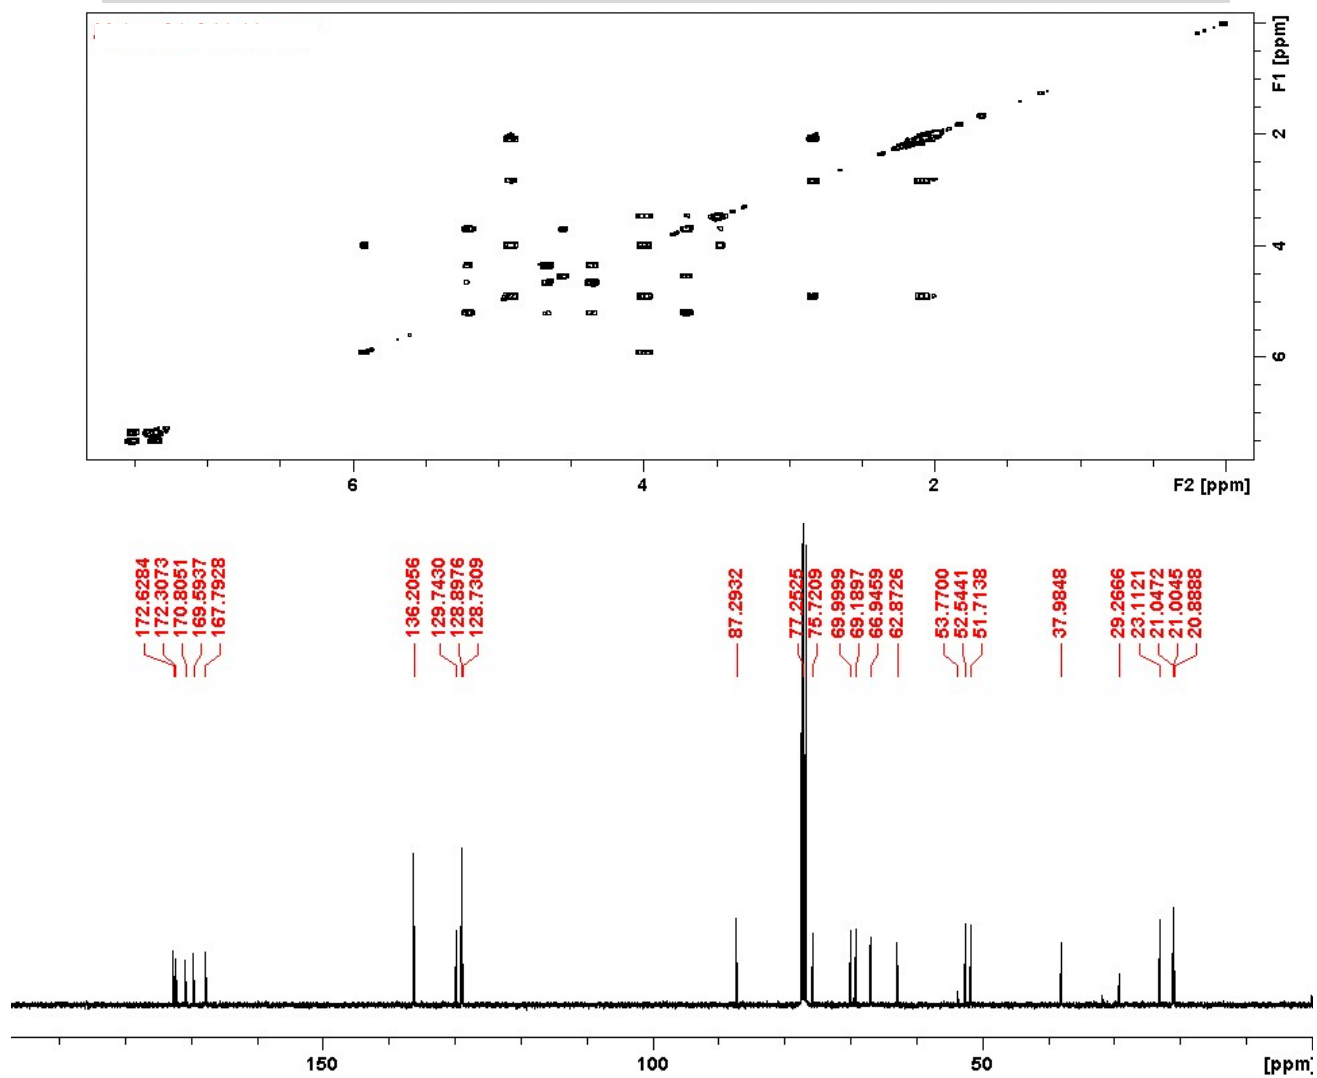

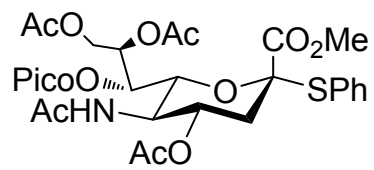

13

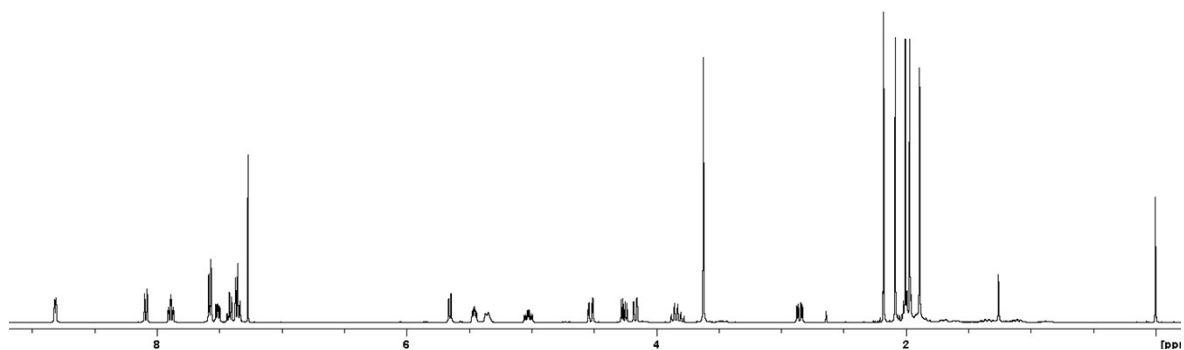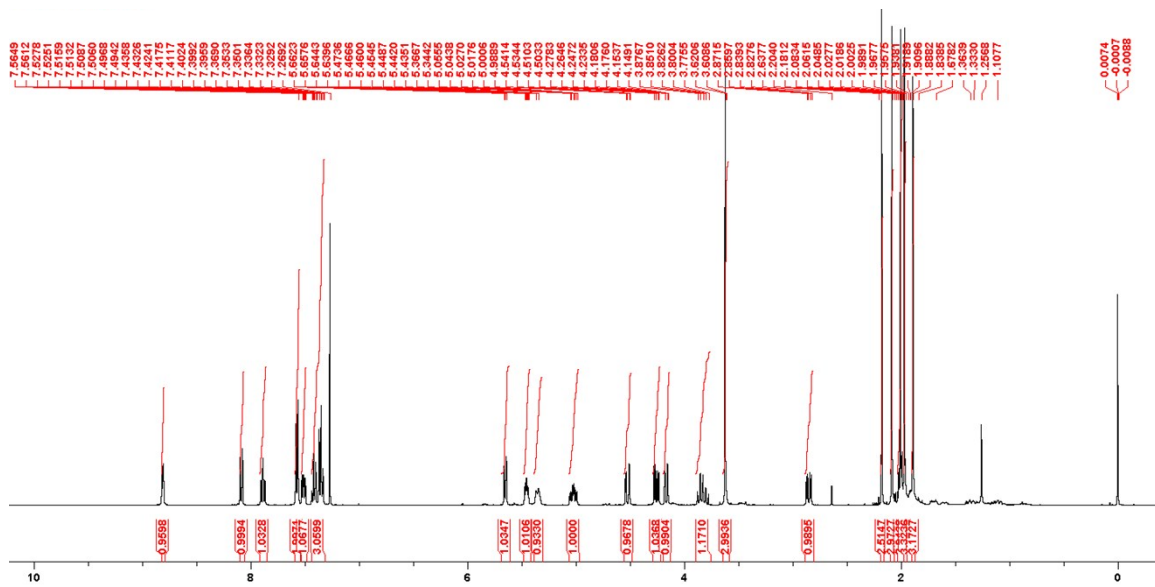

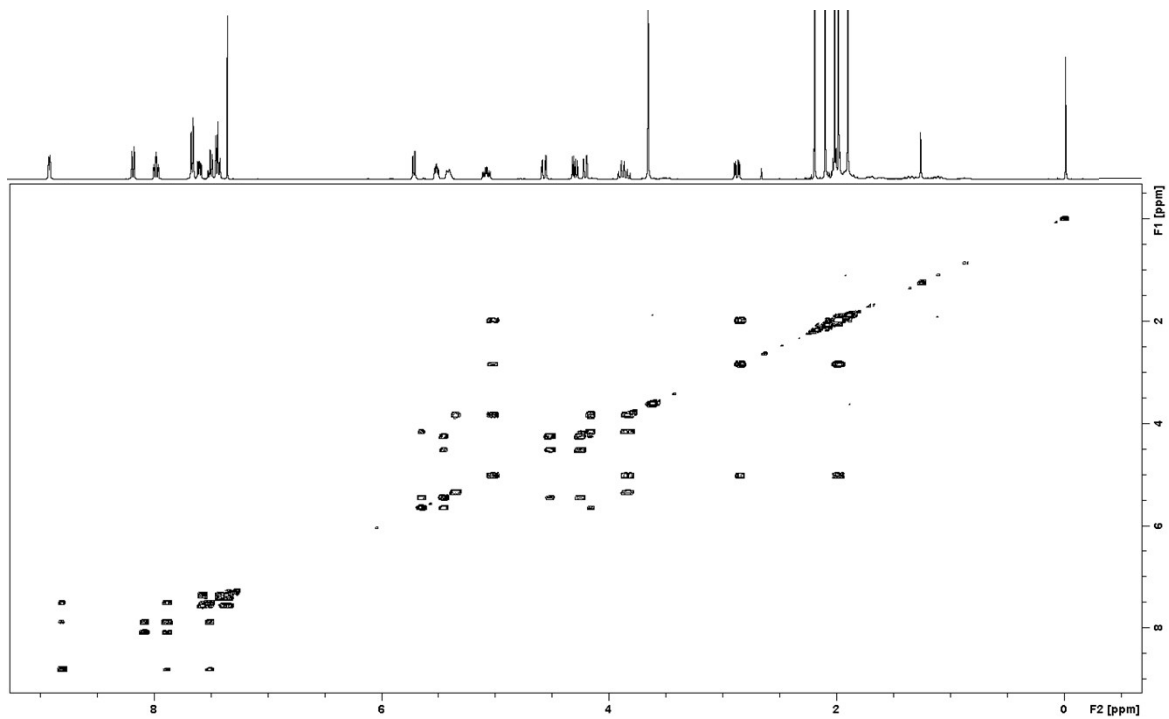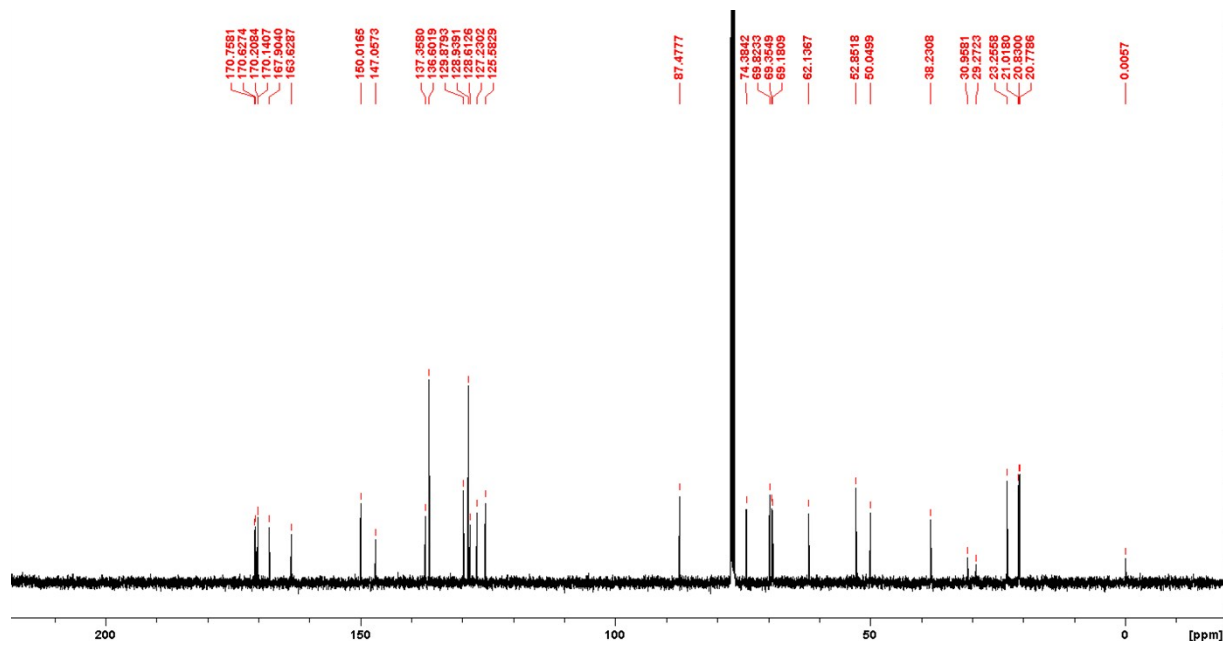

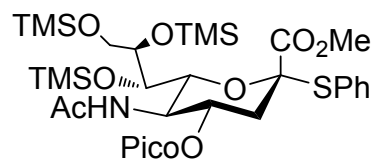

14

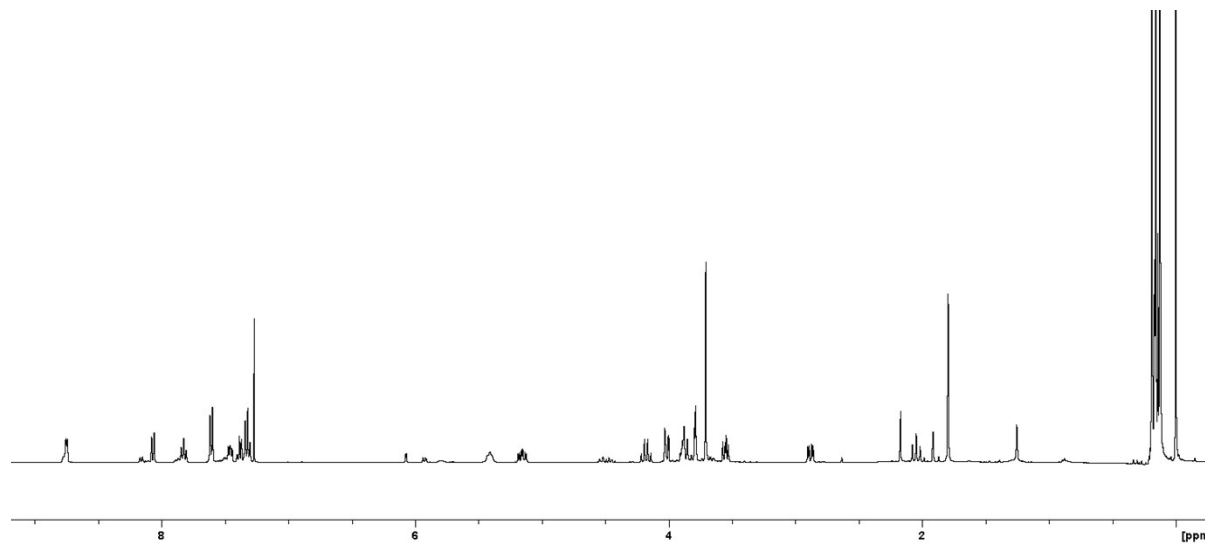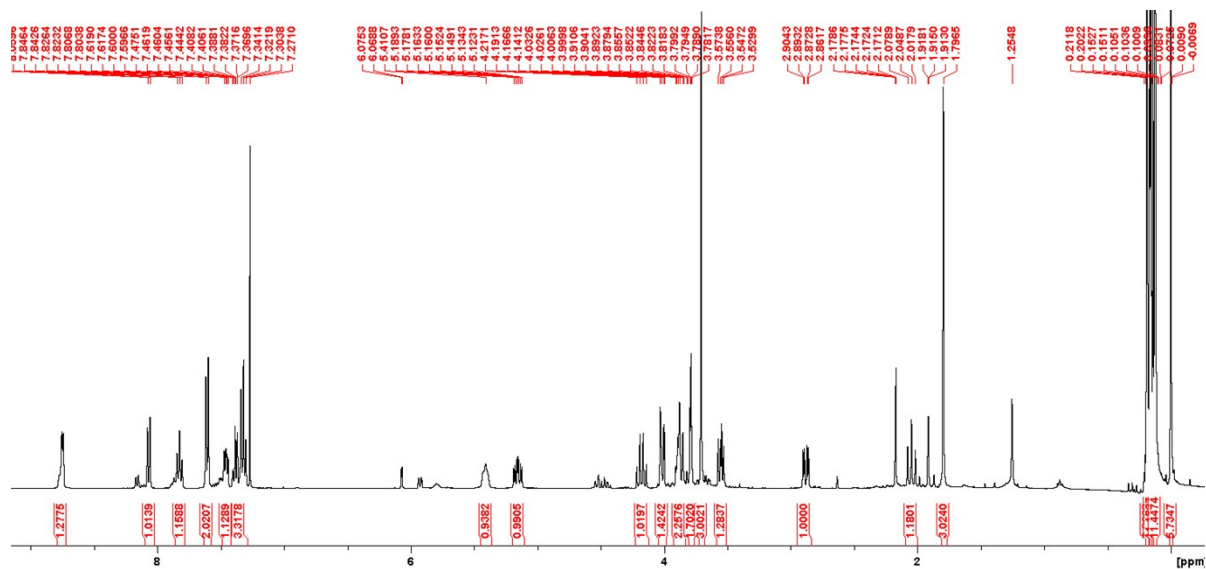

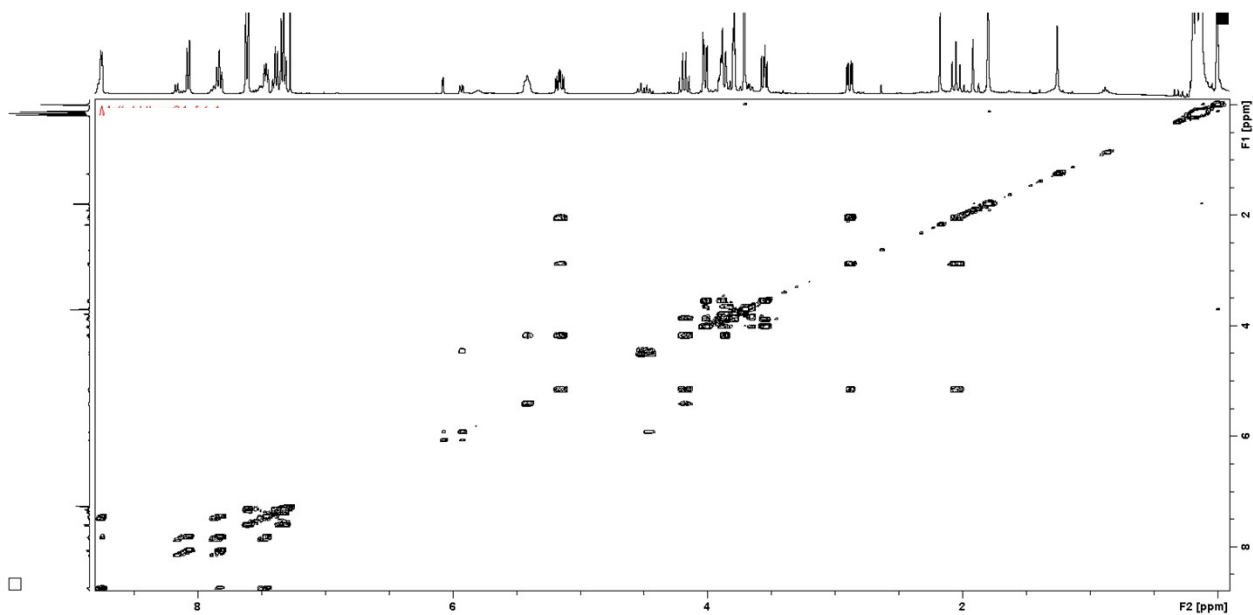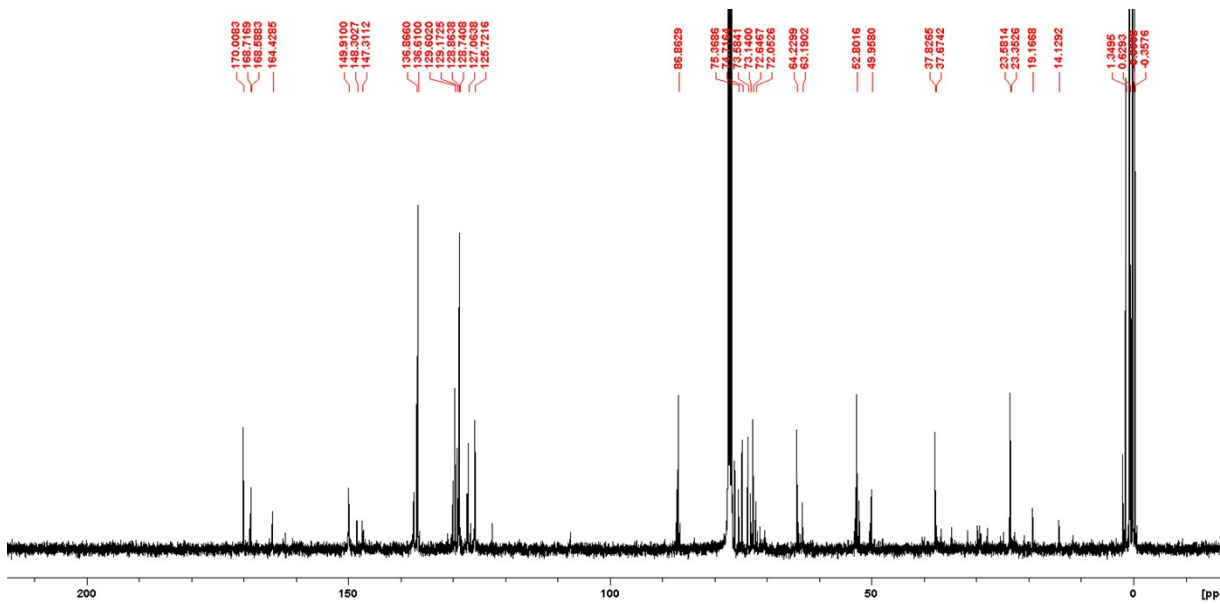

Supplement: c8nj02795a1.pdf [file c8nj02795a1.pdf]
